# Supplementary material for: Selective CO2 adsorption in a flexible non-interpenetrated metal–organic framework
Source: Royal Society of Chemistry journal article supplement (doi:10.1039/c0cc05199c), 2011-01-01
Supplement: c0cc05199c.pdf [file c0cc05199c.pdf]

**Supporting Information**

**Selective CO<sub>2</sub> adsorption in a flexible non-interpenetrated  
metal-organic framework**

*Tae Kyung Kim and Myunghyun Paik Suh\**

Department of Chemistry, Seoul National University, Seoul 151-747, Republic of Korea

Fax: (+82) 2 8868516

E-mail: [mpsuh@snu.ac.kr](mailto:mpsuh@snu.ac.kr)

**General Method.** All chemicals and solvents used in the syntheses were of reagent grade and used without further purification. Tetrakis[4-(carboxyphenyl)oxamethyl]methane (H<sub>4</sub>TCM) was prepared according to the method previously reported.<sup>S1</sup> Infrared spectra were recorded with a PerkinElmer Spectrum One FT-IR spectrophotometer. UV/vis diffuse reflectance spectra were recorded with a PerkinElmer Lambda 35 UV/vis spectrophotometer. Elemental analyses were performed with a PerkinElmer 2400 Series II CHN Analyzer. NMR spectra were measured on a Bruker Avance DPX-300. Thermogravimetric analyses (TGA) and differential scanning calorimetry (DSC) were performed under N<sub>2</sub> (g) at a scan rate of 5 °Cmin<sup>-1</sup>, using a TGA Q50 and a DSC Q10 of TA instruments, respectively. Powder X-ray diffraction data were recorded on a Mac Science M18XHF-22 diffractometer at 50 kV and 100 mA for Cu K $\alpha$  ( $\lambda = 1.54050 \text{ \AA}$ ), with a scan speed 5 °min<sup>-1</sup> and a step size of 0.02° in  $2\theta$ .

**[Cu<sub>2</sub>(TCM)(H<sub>2</sub>O)<sub>2</sub>] $\cdot$ 7DMF $\cdot$ 3(1,4-dioxane) $\cdot$ MeOH (SNU-21).** H<sub>4</sub>TCM (0.033 g, 0.054 mmol) was dissolved in a mixture of DMF (3 mL) and 1,4-dioxane (3mL), and mixed with MeOH (1 mL) solution of Cu(NO<sub>3</sub>)<sub>2</sub> $\cdot$ 2.5H<sub>2</sub>O (0.025 g, 0.11 mmol). Aqueous HCl (35%) was added (1-2 drops) to the mixture. The solution was heated in a glass serum bottle at 80 °C for 24 h, and then cooled to room temperature. Bluish-green prismatic crystals formed, which were filtered, and washed briefly with the DMF, 1,4-dioxane and MeOH mixture (3:3:1, v/v). Yield: 40 mg (47%). Anal. Calcd for Cu<sub>2</sub>C<sub>67</sub>H<sub>105</sub>N<sub>7</sub>O<sub>28</sub>: C, 50.81; H, 6.68; N, 6.19. Found: C, 50.25; H, 6.38; N, 6.04. FT-IR (Nujol mull):  $\nu_{\text{OH(water)}}$ , 3410 (m, br);  $\nu_{\text{C=O(guest DMF)}}$ , 1677 (br);  $\nu_{\text{O-C=O}}$ , 1605, 1571 (s) cm<sup>-1</sup>. UV/vis (diffuse reflectance spectrum,  $\lambda_{\text{max}}$ ): 711 nm.

**[Cu<sub>2</sub>(TCM)]<sub>n</sub> (SNU-21H).** The crystals of SNU-21 were heated at 180 °C under vacuum for 12 h. The color of SNU-21H changed from bluish-green to light green. Anal. Calcd for Cu<sub>2</sub>C<sub>33</sub>H<sub>24</sub>O<sub>12</sub>: C, 53.59; H, 3.27; N, 0.00. Found: C, 52.31; H, 3.28; N, 0.08. FT-IR (Nujol mull):  $\nu_{\text{O-C=O}}$ , 1605(s), 1564(s) cm<sup>-1</sup>. UV/vis (diffuse reflectance spectrum,  $\lambda_{\text{max}}$ ): 723 nm.

21 as synthesized were placed in the supercritical dryer together with the solvent (DMF, 1,4-dioxane and MeOH), and the drying chamber was sealed. The temperature and pressure of the chamber were raised to 45 °C and 200 bar with CO<sub>2</sub>, above the critical point (31 °C and 73 atm). The chamber was vented with the rate of 15 mL/min, and then filled with CO<sub>2</sub> again. The cycle of refilling with CO<sub>2</sub>, pressurizing, and venting was repeated for 6 h. After drying, the closed container with the dried crystals was transferred to a glove bag, and the sample was manipulated in a glove bag to prevent it from the exposure to air. Anal. Calcd for Cu<sub>2</sub>C<sub>33</sub>H<sub>24</sub>O<sub>12</sub>: C, 53.59; H, 3.27; N, 0.00. Found: C, 52.70; H, 3.19; N, 0.31. FT-IR (Nujol mull): 1606 (s);  $\nu_{\text{O-C=O}}$ , 1565 (s) cm<sup>-1</sup>. UV/vis (diffuse reflectance spectrum,  $\lambda_{\text{max}}$ ): 698 nm.

**X-ray Crystallography.** Diffraction data for SNU-21 was collected with an Enraf Nonius Kappa CCD diffractometer (Mo K $\alpha$ ,  $\lambda = 0.71073 \text{ \AA}$ , graphite monochromator). Preliminary orientation matrixes and unit cell parameters were obtained from the peaks of the first 10 frames and then refined using the whole data set. The frames were integrated and corrected for the Lorentz and polarization effects using *DENZO*.<sup>S2</sup> The scaling and global refinement of the crystal parameters were performed by using *SCALEPACK*.<sup>S2</sup> No absorption correction was made. The crystal structures were solved by the direct method<sup>S3</sup> and refined by full-matrix least-squares refinement using the SHELXL-97 computer program.<sup>S4</sup> The positions of all of the non-hydrogen atoms were refined with anisotropic displacement factors. The hydrogen atoms were positioned geometrically and refined using a riding model. The identity and number of the guest molecules (7DMF, 3(1,4-dioxane), and MeOH) in SNU-21 were determined based on the IR, EA, NMR, and TGA data. The electron densities of the disordered guest molecules were flattened by using the SQUEEZE option of *PLATON*.<sup>S5</sup> The crystallographic data and selected bond distances and angles are summarized in Table S1 and Table S2.

**Low Pressure Gas Sorption Measurements.** The gas adsorption–desorption experiments were performed using an automated micropore gas analyzer, an Autosorb-3B (Quantachrome Instruments).

[Cu<sub>2</sub>(TCM)]<sub>n</sub> (SNU-21H) was pre-adsorbed by heating SNU-21 in a Schlenk tube at 180 °C under vacuum for 12 h. The measured amount of the pre-dried solid was introduced to the gas sorption apparatus and then activated at 180 °C under vacuum for 2 h, and then the gas sorption was measured. Between the experiments with various gases, the out-gassing procedure was repeated for ca. 1 h. For [Cu<sub>2</sub>(TCM)]<sub>n</sub> (SNU-21S), the gas sorption isotherms were measured without activation procedure. All of the gases used were of 99.999% purity. The N<sub>2</sub> and O<sub>2</sub> gas sorption isotherms were monitored at 77 K by using liquid nitrogen, and the H<sub>2</sub> gas sorption isotherms were monitored at 77 K and 87 K at each equilibrium pressure by the static volumetric method. The adsorption isotherms for the CO<sub>2</sub> and CH<sub>4</sub> gases were measured at 195 K, 273 K, and 298 K.

**Estimation of Isosteric Heats of H<sub>2</sub> Adsorption.** The isosteric heats of H<sub>2</sub> adsorption for SNU-21H and SNU-21S were estimated from the H<sub>2</sub> sorption data measured at 77 K and 87 K. A virial-type expression was used (eq 1), which is composed of parameters  $a_i$  and  $b_i$ , which are independent of temperature.<sup>S6</sup> In eq. 1,  $P$  is the pressure in atm,  $N$  is the amount of adsorbed H<sub>2</sub> gas in mgg<sup>-1</sup>,  $T$  is the temperature in K,  $a_i$  and  $b_i$  are the virial coefficients, and  $m$  and  $n$  represent the number of coefficients required to adequately describe the isotherms. An equation was fit using the R statistical software package.<sup>S7</sup>

$$\ln P = \ln N + \frac{1}{T} \sum_{i=0}^m a_i N^i + \sum_{i=0}^n b_i N^i \quad (1)$$

The values of the virial coefficients  $a_0$  through  $a_m$  were then used to calculate the isosteric heat of adsorption using the following expression:

$$Q_{st} = -R \sum_{i=0}^m a_i N^i \quad (2)$$

Here,  $Q_{st}$  is the coverage-dependent isosteric heat of adsorption and  $R$  is the universal gas constant.

**Estimation of Isothermic Heats of CO<sub>2</sub> and CH<sub>4</sub> Adsorption.** Gas adsorption data at 195 K, 273 K, and 298 K were fit to Langmuir-Freundlich equation (eq 3), and then heat of adsorption was calculated by using Clausius-Clapeyron equation (eq 4) at each gas loading point.<sup>S6</sup>

$$N = \frac{N_m b P^{1/t}}{1 + b P^{1/t}} \quad (3)$$

$$\frac{\partial(\ln P)}{\partial(1/T)} = -\frac{Q_{st}}{R} \quad (4)$$

**High Pressure Gas Sorption Measurements.** High-pressure sorption isotherms for H<sub>2</sub>, CO<sub>2</sub>, and CH<sub>4</sub> gases were measured on a Rubotherm MSB (magnetic suspension balance) apparatus by the gravimetric method. All of the gases used were of 99.999% purity and the trace of moisture was removed by drying trap (model 500) filled with 5 Å molecular sieves, which was purchased from the Chromatography Research Supplies (CRS). A measured amount of SNU-21S, which was prepared by supercritical CO<sub>2</sub> drying method, was introduced to the apparatus and activated by evacuation at room temperature. To obtain the excess adsorption isotherm, all the data were corrected for buoyancy of the system and the sample. The buoyancy correction of the sample was made by multiplying the volume of the framework skeleton by the density of corresponding gas at each pressure and temperature.<sup>S8</sup> The sample density used for buoyancy correction was determined from the He displacement isotherm (up to 90 bars) measured at 298 K. The total amount of gas adsorbed was calculated using the following equation:<sup>S9</sup>

$$C_{\text{total}} = C_{\text{excess}} + (V_{\text{pore}} \times d_{\text{gas}} \times 100) \quad (5)$$

where  $C_{\text{total}}$  is the total adsorbed amount (wt%),  $C_{\text{excess}}$  is the excess adsorbed amount (wt%) on the surface,  $V_{\text{pore}}$  is the pore volume (cm<sup>3</sup>g<sup>-1</sup>) calculated from the gas sorption, and  $d_{\text{gas}}$  is the density of the compressed gas as a function of temperature and pressure (gcm<sup>-3</sup>).<sup>S8</sup>

Prior to gas cycling, **SNU-21H** was reactivated at 180 °C for 2 h and **SNU-21S** was reactivated at 30 °C for 1 h, followed by cooling to 25 °C under a nitrogen atmosphere. A flow of 15% (v/v) CO<sub>2</sub> mixture in N<sub>2</sub> was applied followed by a stream of pure N<sub>2</sub> (99.9999%). The flow rates for pure N<sub>2</sub> gas and CO<sub>2</sub> mixture gas are 60 mL min<sup>-1</sup> and 40 mL min<sup>-1</sup>, respectively.

- (S1) H. Oike, H. Imamura, H. Imaizumi and Y. Tezuka, *Macromolecules* 1999, **32**, 4819.
- (S2) Z. Otwinowsky, W. Minor, *Processing of X-ray Diffraction Data Collected in Oscillation Mode. Methods in Enzymology*; C. W. Cater, R. M. Sweet, Eds., Academic Press, New York, 1996, **276**, 307.
- (S3) G. M. Sheldrick, *Acta Crystallogr.* 1990, **A46**, 467.
- (S4) G. M. Sheldrick, *SHELXL97, Program for the crystal structure refinement*; University of Göttingen: Göttingen, Germany, 1997.
- (S5) P.v.d. Sluis, A. L. Speck, *Acta Crystallogr., Sect A* 1990, **46**, 194.
- (S6) (a) M. Dincă, A. Dailly, Y. Liu, C. M. Brown, D. A. Neumann and J. R. Long, *J. Am. Chem. Soc.* 2006, **128**, 16876; (b) Czepirski and J. Jagiello, *Chem. En. Sci.* 1989, **44**, 797.
- (S7) The software package area available online at <http://www.r-project.org>.
- (S8) NIST chemistry webbook (thermophysical properties of fluid systems): <http://webbook.nist.gov/chemistry/fluid/>.
- (S9) (a) H. Furukawa, M. A. Miller and O. M. Yaghi, *J. Mater. Chem.* 2007, **17**, 3197; (b) A. R. Millward and O. M. Yaghi, *J. Am. Chem. Soc.* 2005, **127**, 17998; (c) S. S. Kaye, A. Dailly, O. M. Yaghi and J. R. Long, *J. Am. Chem. Soc.* 2007, **129**, 14176.1

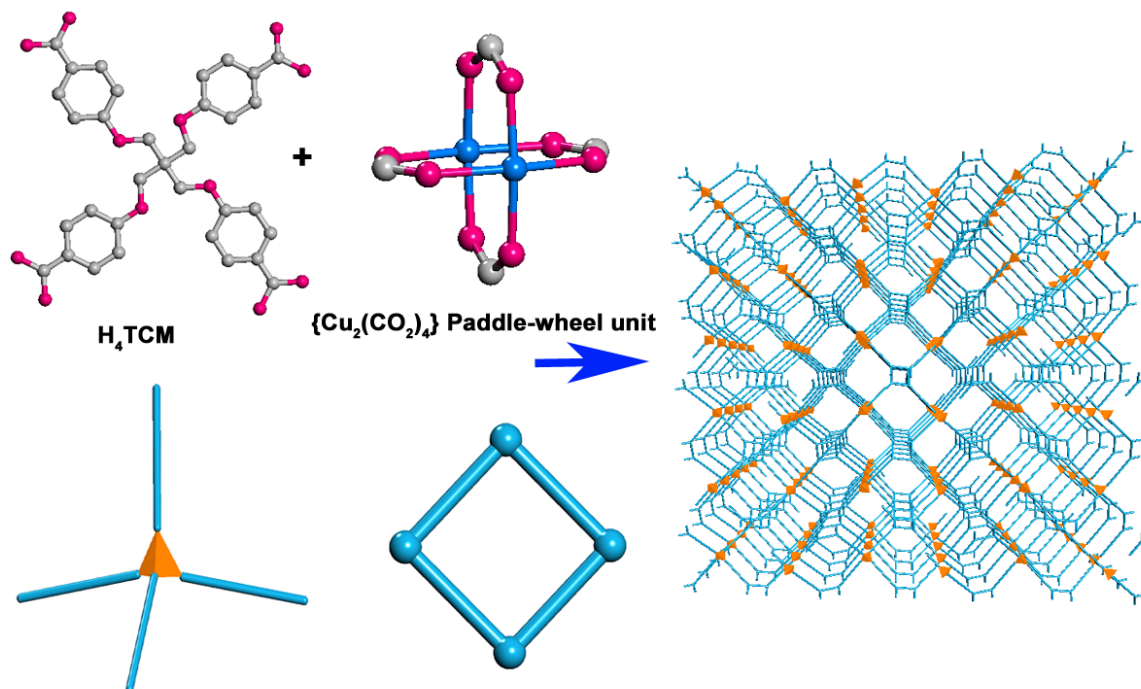

**Scheme S1.** Synthetic strategy for construction of PtS-type net from a tetrahedral organic building block and a paddle-wheel SBU.

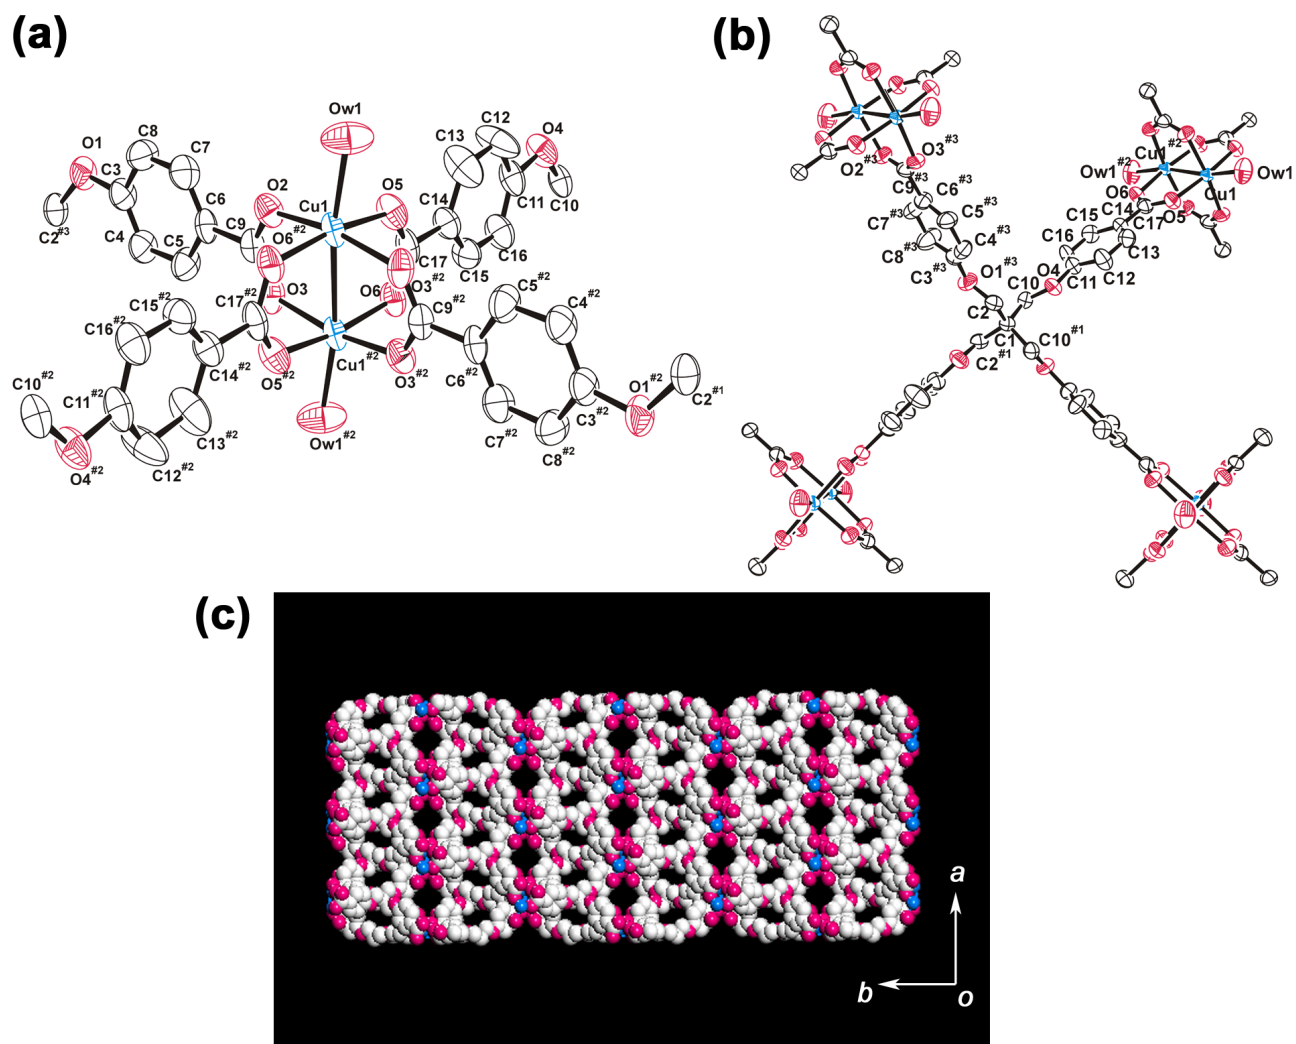

**Fig. S1** The X-ray crystal structure of  $\{[\text{Cu}_2(\text{TCM})(\text{H}_2\text{O})_2] \cdot 7\text{DMF} \cdot 3(1,4\text{-dioxane}) \cdot \text{MeOH}\}_n$  (**SNU-21**) (a) An ORTEP drawing with atomic numbering scheme (thermal ellipsoids at 30% probability). Symmetry operation: #1,  $x+1/2, y-1/2, z$ ; #2,  $-x+2, -y+1, -z$ ; #3,  $-x+3/2, -y+3/2, -z$ . (b) An ORTEP drawing with an atomic numbering scheme (thermal ellipsoids at 30% probability). The hydrogen atoms of coordinated water molecules were not located. Hydrogen atoms are omitted for clarity. Symmetry operations: #1,  $-x+2, y, -z+1$ ; #2,  $-x+2, -y+1, -z$ ; #3,  $-x+3/2, -y+3/2, -z$ . (c) A view seen on *ab* plane. Color code: Cu, blue; C, white; O, red.



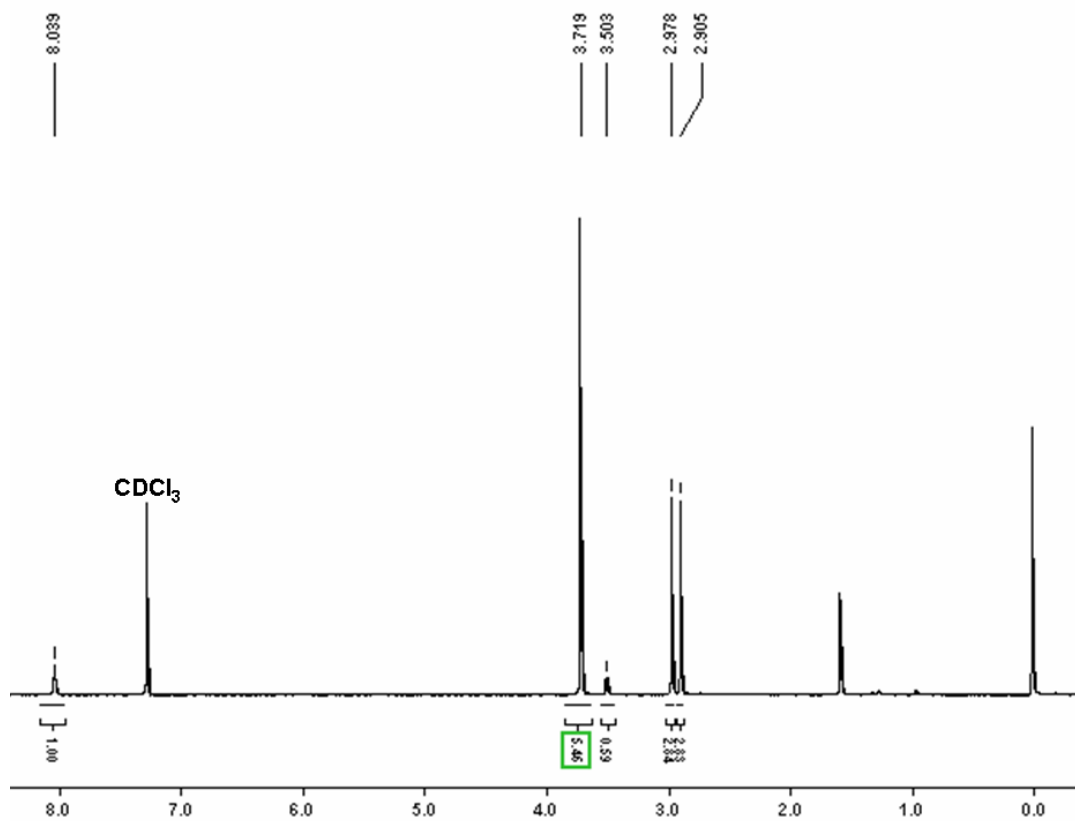

**Fig. S2**  $^1\text{H-NMR}$  spectrum of  $\text{CDCl}_3$  after the immersion of  $\{[\text{Cu}_2(\text{TCM})(\text{H}_2\text{O})_2] \cdot 7\text{DMF} \cdot 3(1,4\text{-dioxane}) \cdot \text{MeOH}\}_n$  (**SNU-21**) for 24 h.  $^1\text{H-NMR}$  (300 MHz,  $\text{CDCl}_3$ ):  $\delta$  8.04, 3.72, 3.50, 2.91, 2.98. The spectrum was measured to identify the number of guest solvent molecules in **SNU-21**.

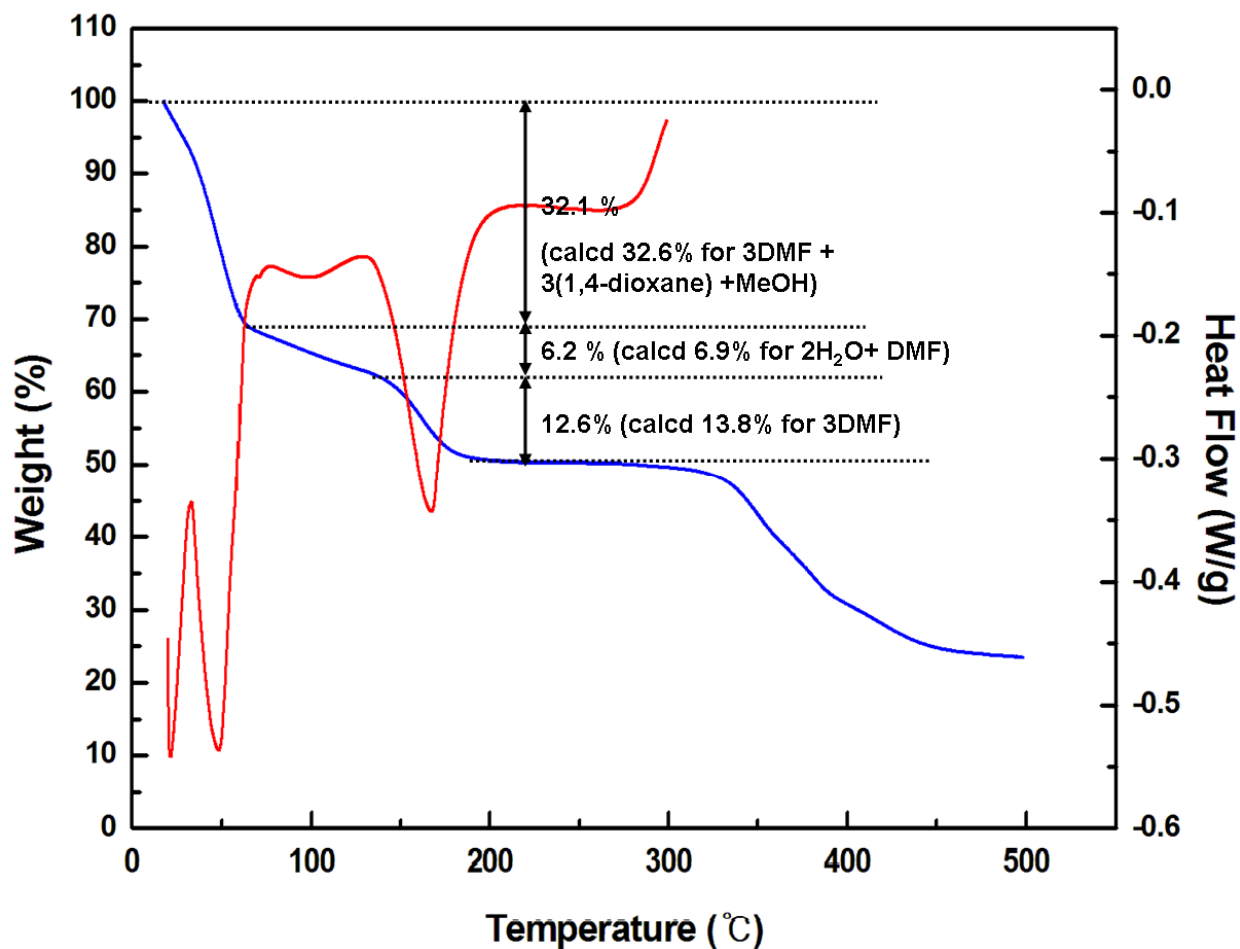

**Fig. S3** TGA/DSC traces for  $\{[\text{Cu}_2(\text{TCM})(\text{H}_2\text{O})_2] \cdot 7\text{DMF} \cdot 3(1,4\text{-dioxane}) \cdot \text{MeOH}\}_n$  (SNU-21). Thermogravimetric analysis revealed 32.1% weight loss at 25-70 °C, corresponding to the loss of three DMF, three 1,4-dioxane, and one MeOH guest molecules (calcd 32.6%) per formula unit, followed by an additional weight loss of 18.8% at 70-300 °C, corresponding to four DMF guests and two coordinated H<sub>2</sub>O molecules (calcd 20.7%).

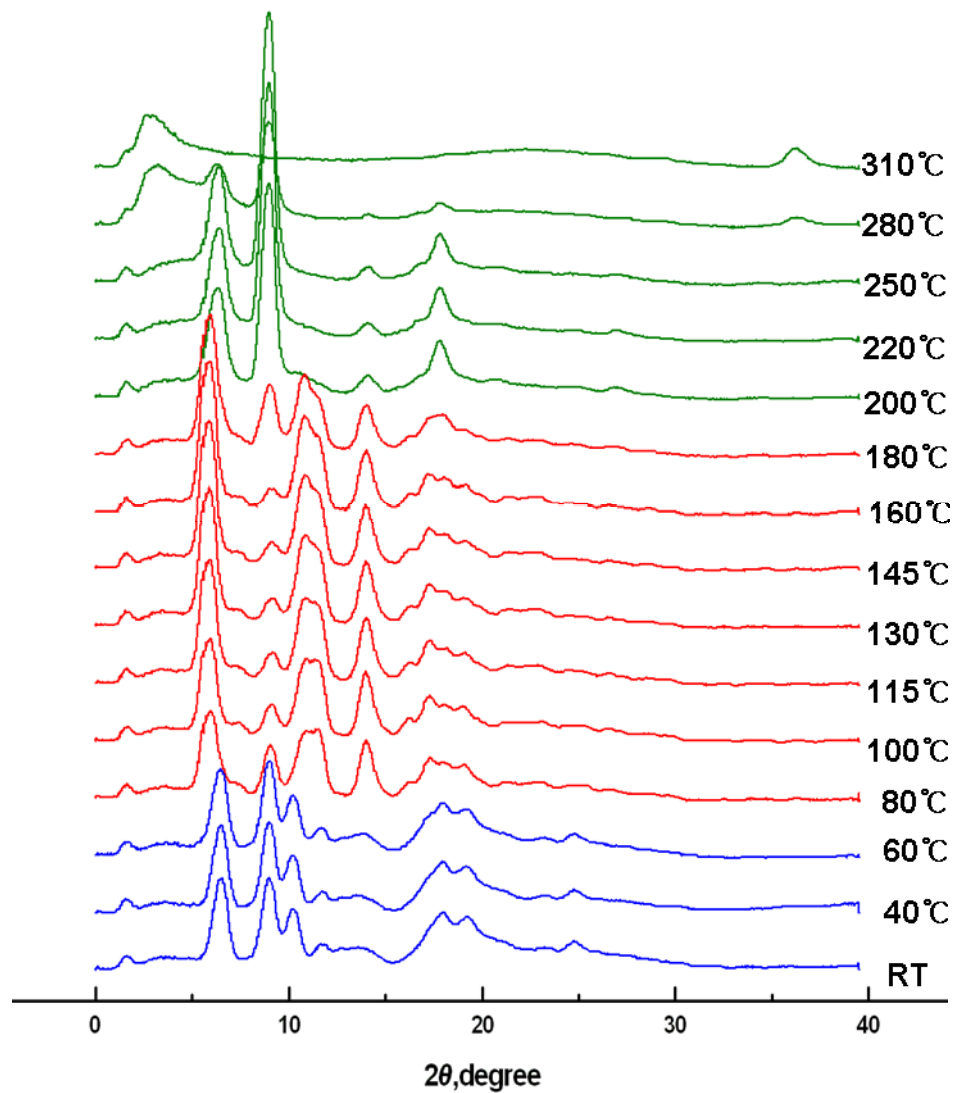

**Fig. S4** The PXR D patterns of SNU-21 measured at various temperatures (from R.T. to 300 °C).

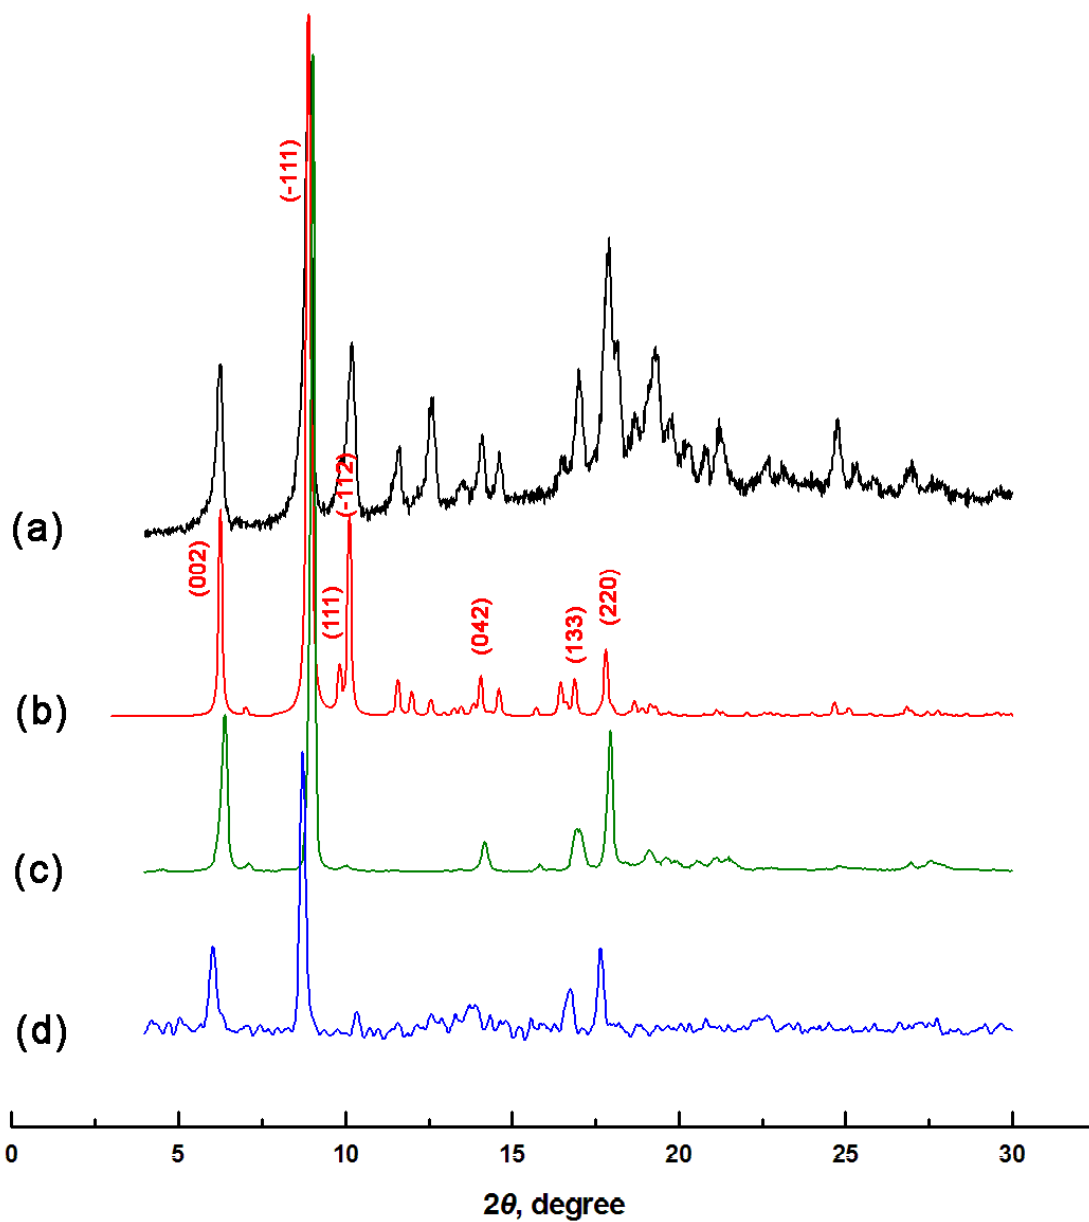

**Fig. S5** The PXRD patterns, for (a) original solid SNU-21, (b) simulated pattern based on the single-crystal X-ray data of SNU-21, (c) desolvated solid SNU-21H prepared by heating SNU-21 at 180 °C under vacuum for 12 h, (d) desolvated solid SNU-21S prepared by supercritical CO<sub>2</sub> drying method.

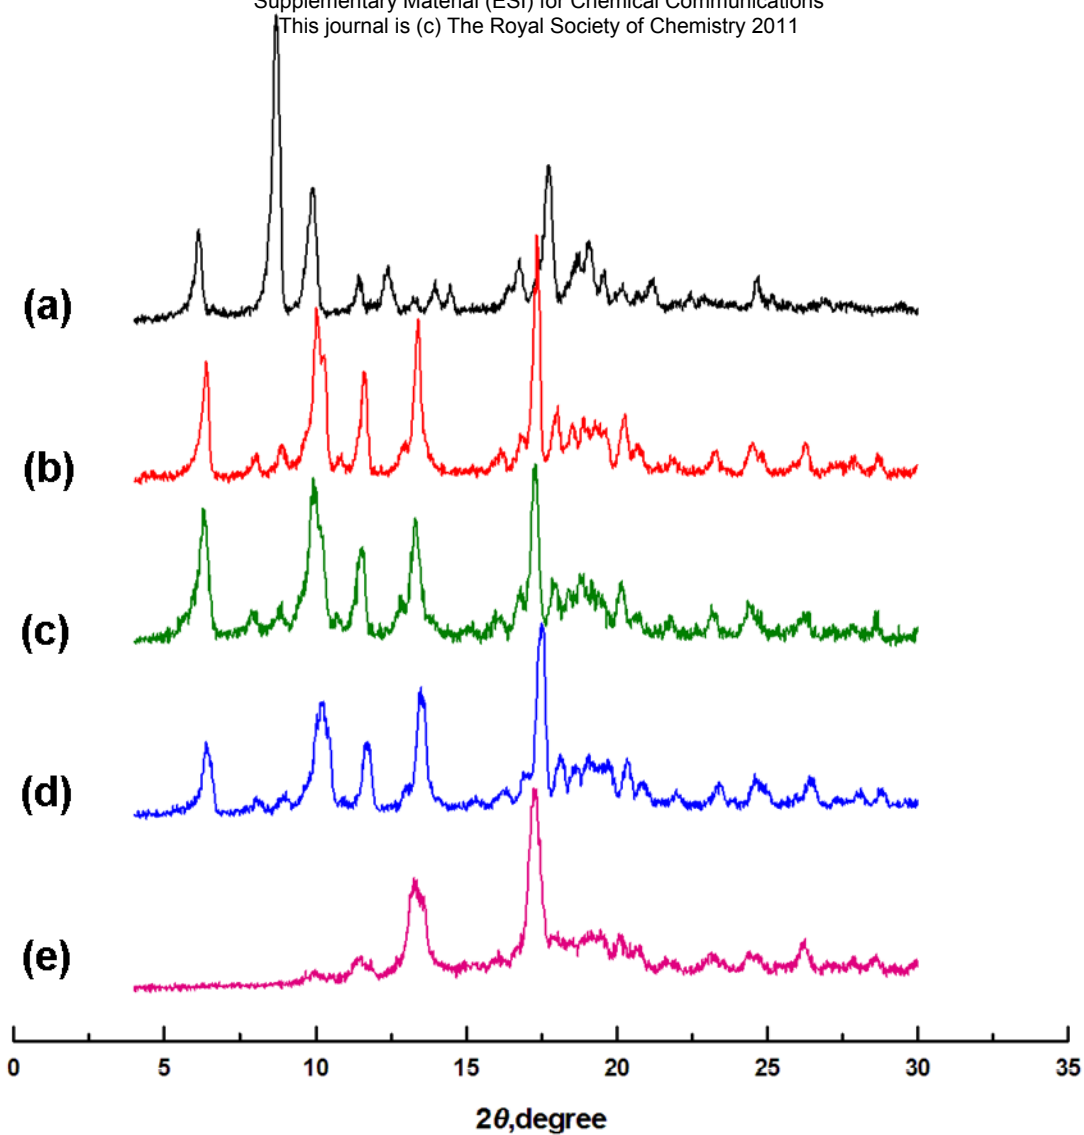

**Fig. S6** The PXRD patterns of SNU-21 on exposure to air. (a) as-synthesized, (b) exposure to air for 1 day, (c) exposure to air for 3 days, (d) exposure to air for 5 days, (e) exposure to air for 7 days. When solid SNU-21 was exposed to air for 1 day, the PXRD pattern of SNU-21 was changed, indicating that the network structure alters due to the loss of guest solvent molecules

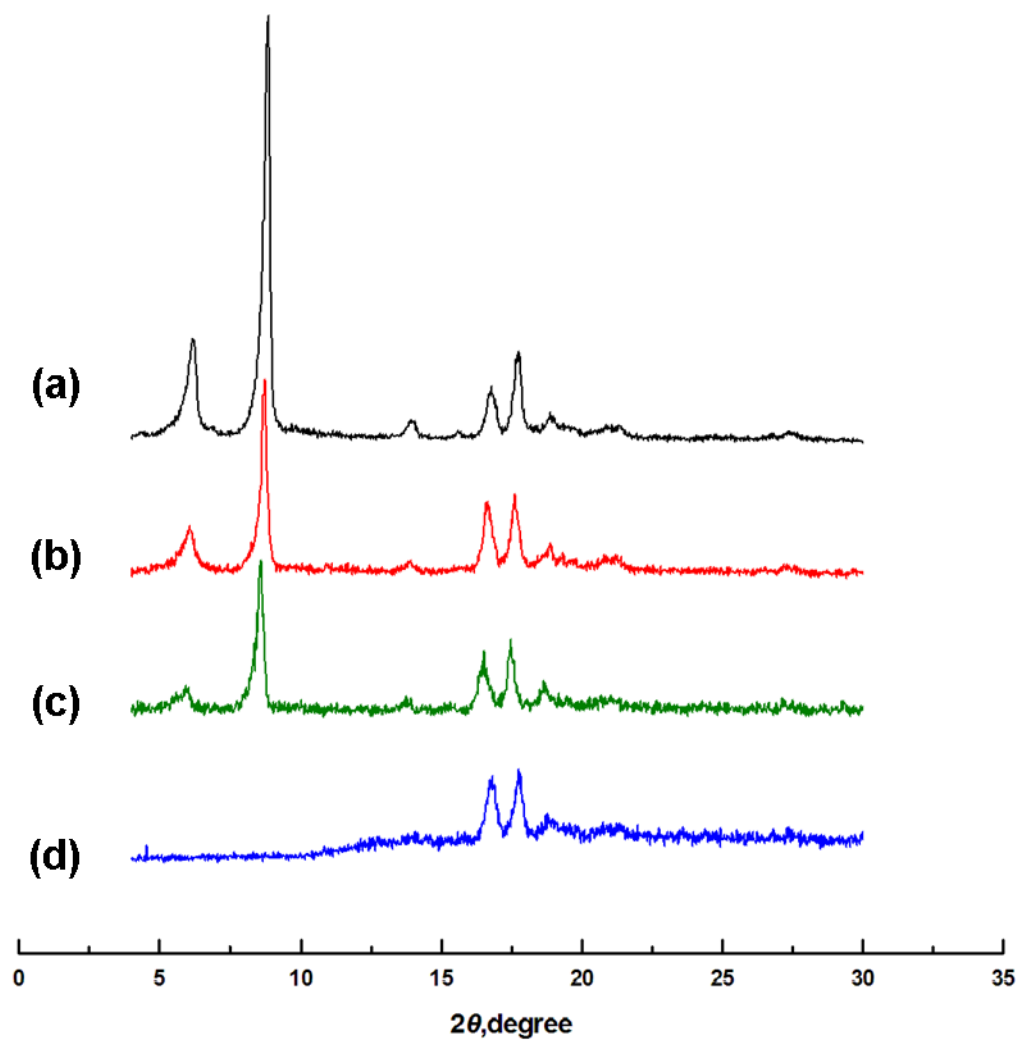

**Fig. S7** The PXRD patterns of SNU-21H. (a) as prepared by drying SNU-21 at 180 °C under vacuum for 12 h, (b) after exposure to air for 1 day, (c) after exposure to air for 5 days, (d) after exposure to air for 7 days.

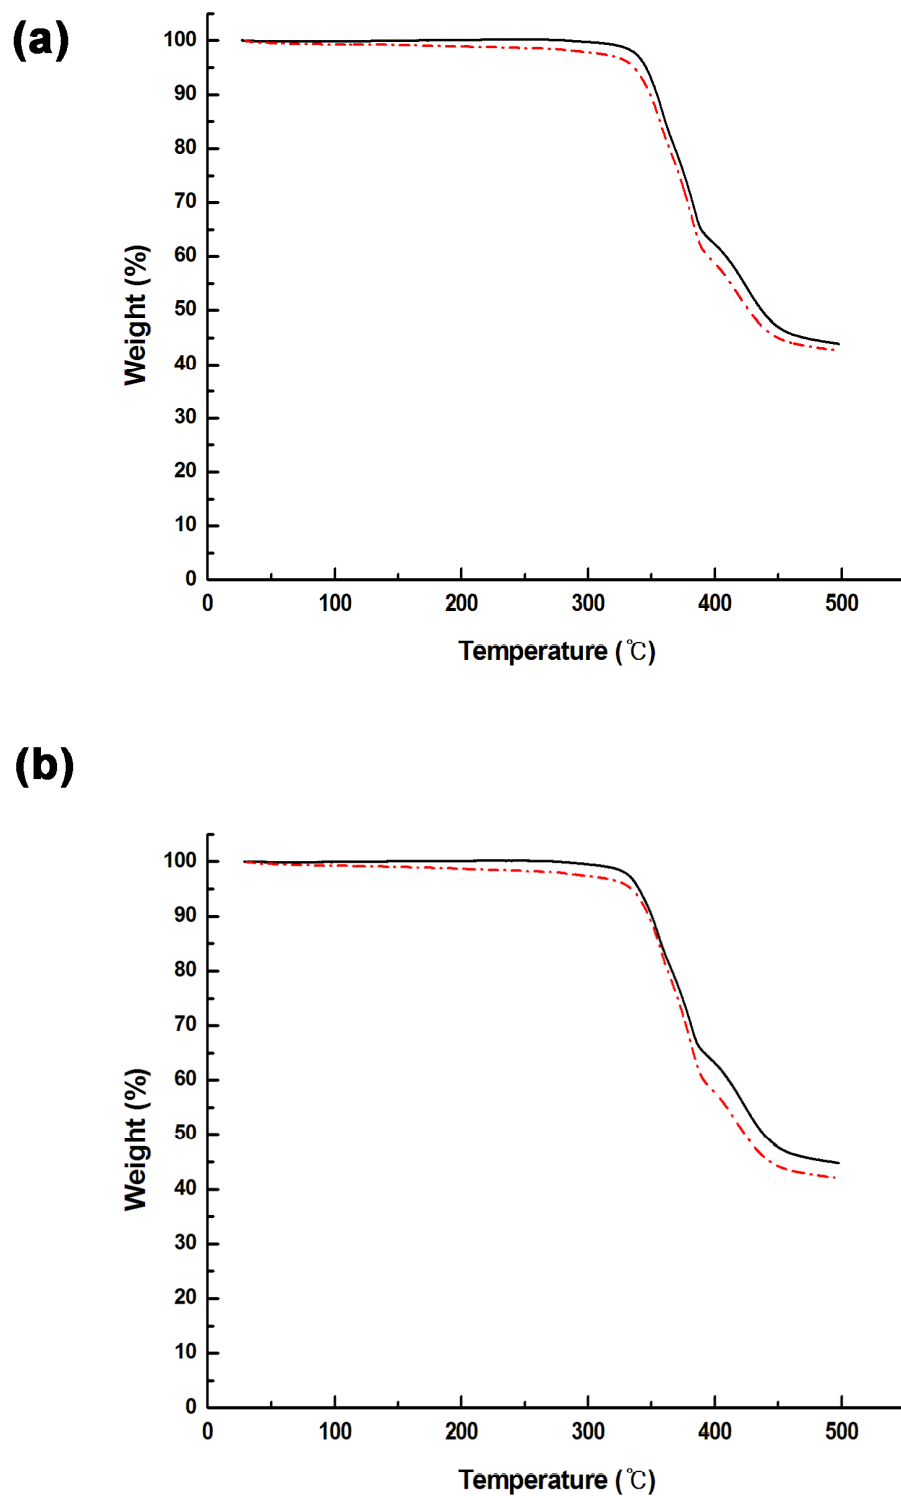

**Fig. S8** TGA traces for SNU-21H (solid line) and SNU-21S (dashed line), (a) before the gas sorption measurement, (b) after the gas sorption measurements.

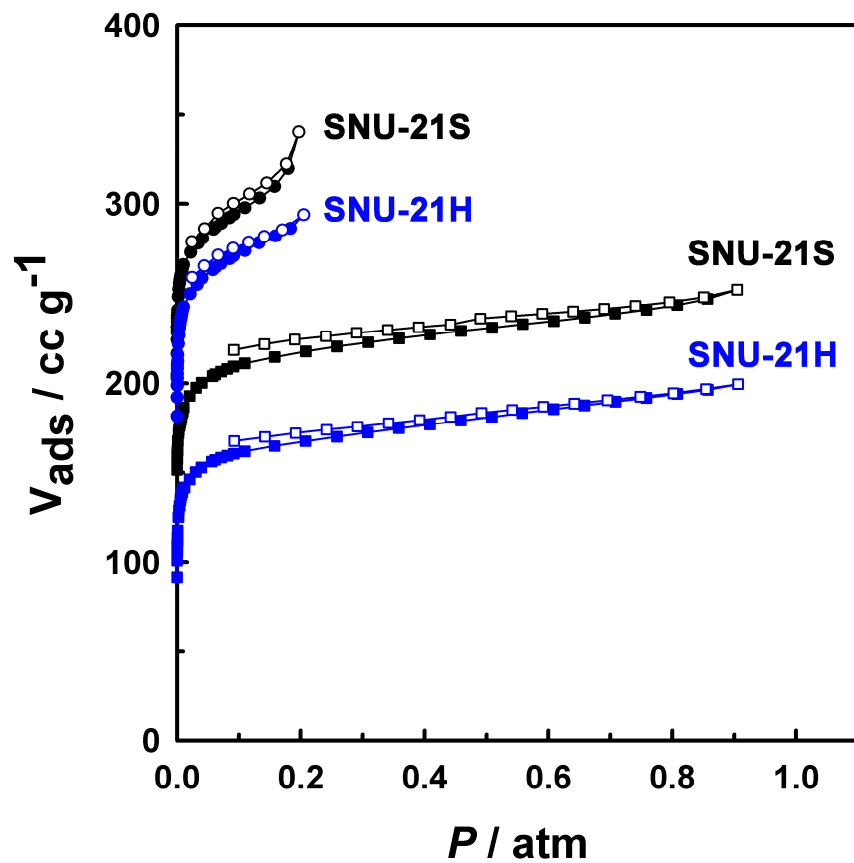

**Fig. S9**  $\text{N}_2$  (square) and  $\text{O}_2$  (circle) sorption isotherms for SNU-21H (blue) and SNU-21S (black) at 77 K.



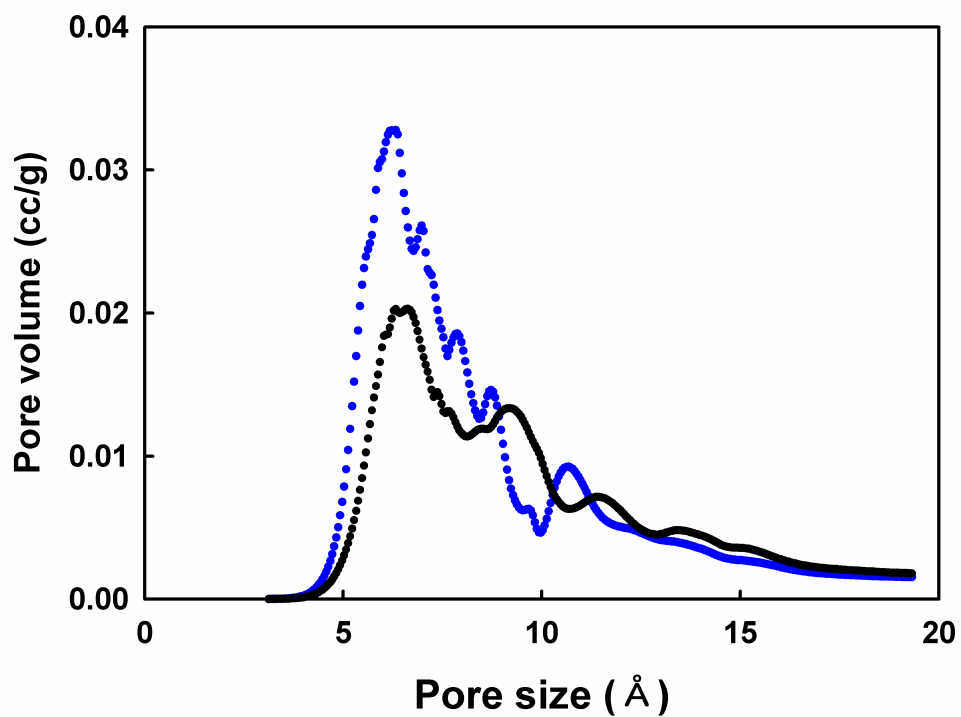

**Fig. S10** Pore size distributions of SNU-21H (blue) and SNU-21S (black) obtained by the Horvath-Kawazoe (HK) method.

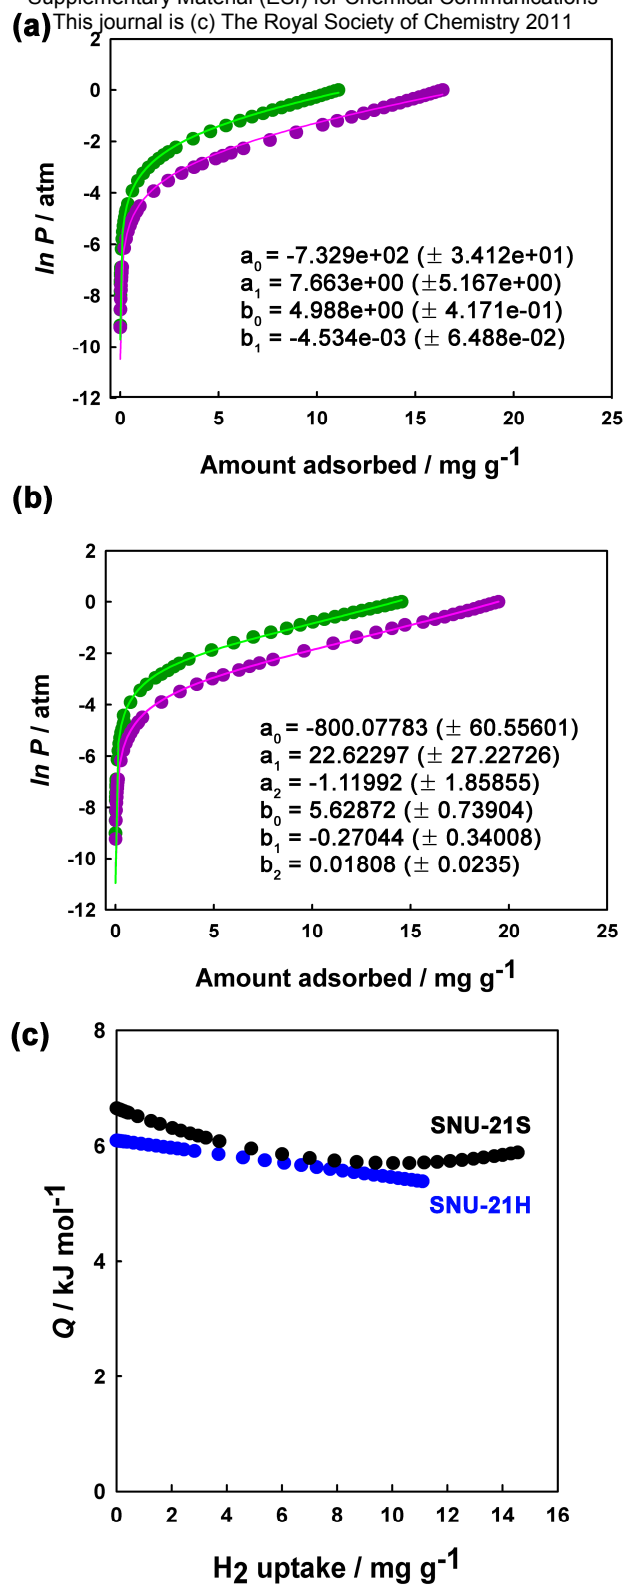

**Fig. S11** Virial fit for the  $\text{H}_2$  adsorption isotherms measured at 77 K (red) and 87 K (green). (a) SNU-21H, (b) SNU-21S, (c) Isosteric heats of  $\text{H}_2$  adsorption for SNU-21H and SNU-21S.

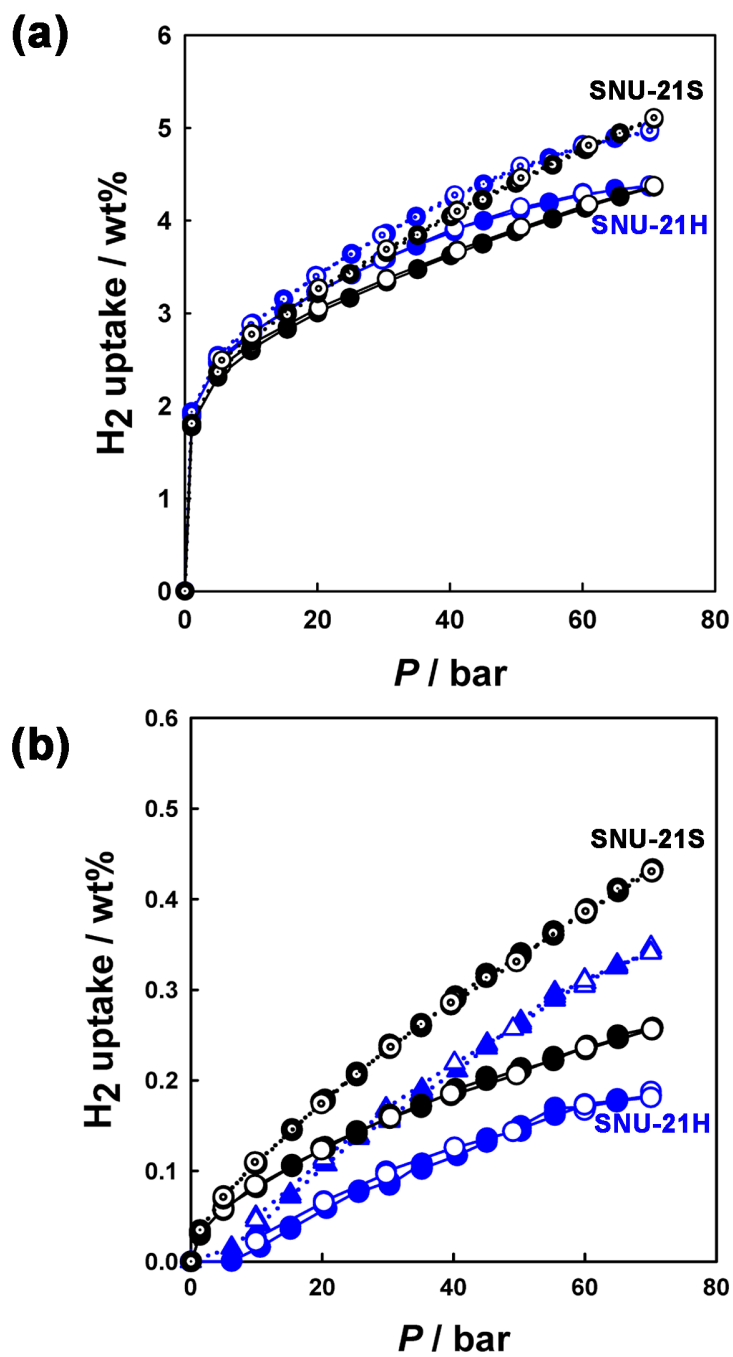

**Fig. S12** High pressure H<sub>2</sub> gas adsorption isotherms, (a) at 77 K, (b) at 298 K. Excess amount, solid line; total amount, dashed line.

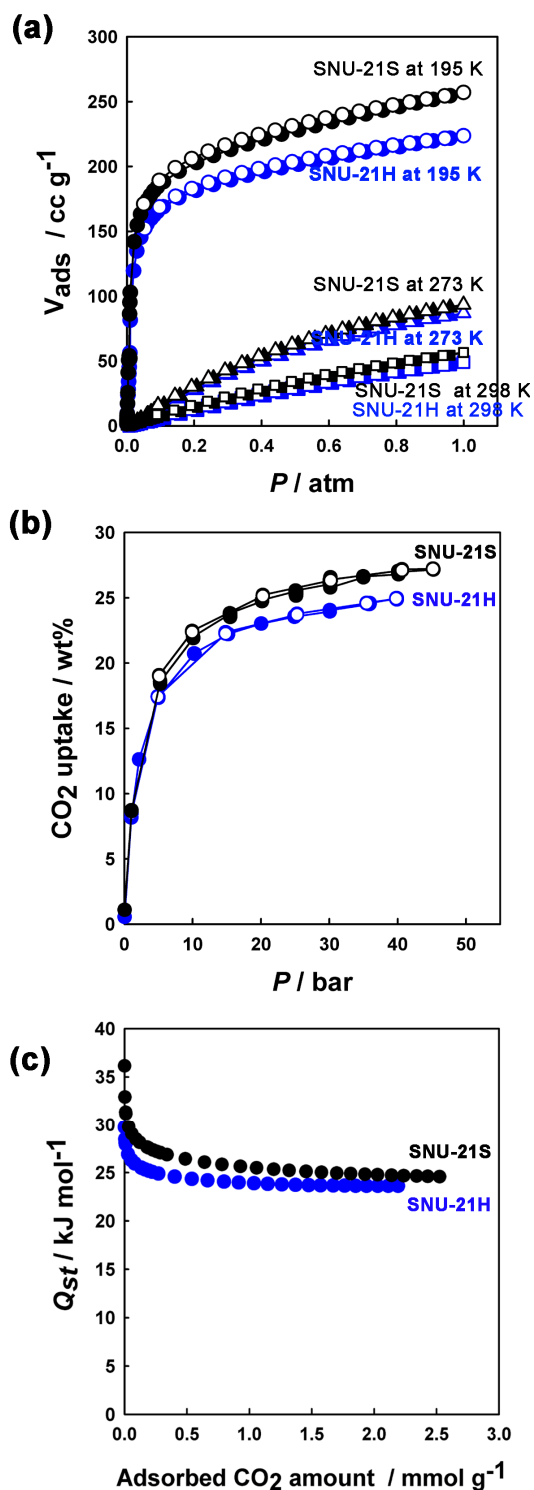

**Fig. S13** The CO<sub>2</sub> sorption isotherms of SNU-21H (blue) and SNU-21S (black). (a) At 195 K (circle), 273 K (triangle), and 298 K (square) measured up to 1 atm. (b) At 298 K and high pressures. (c) Isosteric heats of CO<sub>2</sub> adsorption calculated by Clausius-Clapeyron equation.

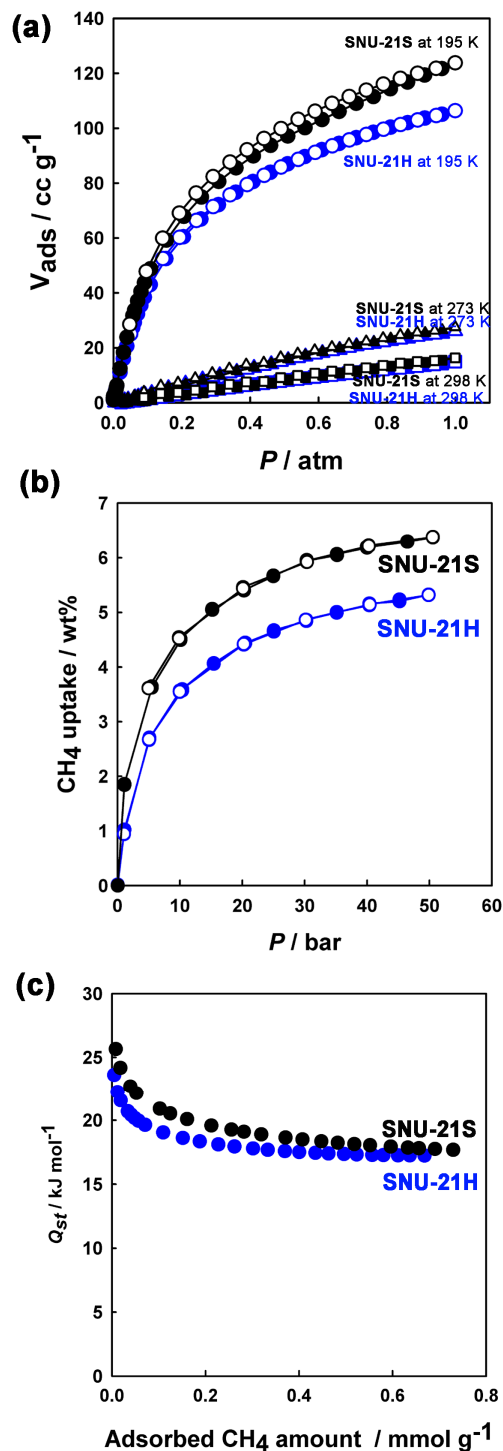

**Fig. S14** The CH<sub>4</sub> sorption isotherms of SNU-21H (blue) and SNU-21S (black). (a) At 195 K (circle), 273 K (triangle), and 298 K (square) measured up to 1 atm. (b) At 298 K and high pressures. (c) Isosteric heats of CH<sub>4</sub> adsorption calculated by Clausius-Clapeyron equation.

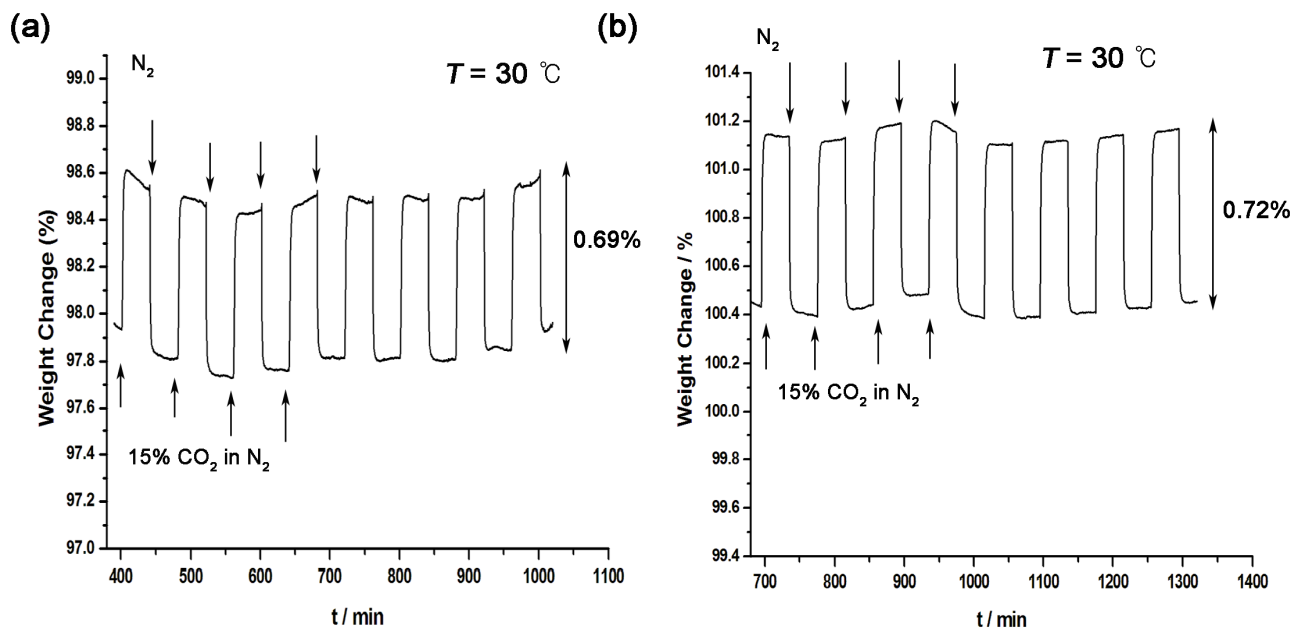

**Fig. S15** Gas cycling experiments for (a) SNU-21H, and (b) SNU-21S at  $30\text{ }^{\circ}\text{C}$ . A stream of 15%  $\text{CO}_2$  in  $\text{N}_2$  was applied, followed by a flow of pure  $\text{N}_2$ .

**Table S1.** Crystallographic Data for SNU-21 [squeezed data].  
 Supplemental Material (ESI) for Chemical Communications  
 This journal is (c) The Royal Society of Chemistry 2011

| Compound                                                                    | SNU-21                                                          |
|-----------------------------------------------------------------------------|-----------------------------------------------------------------|
| formula                                                                     | Cu <sub>2</sub> C <sub>33</sub> H <sub>28</sub> O <sub>14</sub> |
| crystal system                                                              | <i>Monoclinic</i>                                               |
| space group                                                                 | <i>C2/c</i>                                                     |
| fw                                                                          | 775.67                                                          |
| <i>a</i> , Å                                                                | 10.7765(9)                                                      |
| <i>b</i> , Å                                                                | 28.1439(13)                                                     |
| <i>c</i> , Å                                                                | 28.487(2)                                                       |
| $\beta$ , deg                                                               | 98.706(2)                                                       |
| <i>V</i> , Å <sup>3</sup>                                                   | 8540.5(11)                                                      |
| <i>Z</i>                                                                    | 4                                                               |
| $\rho_{calcd}$ , g cm <sup>-3</sup>                                         | 0.603                                                           |
| temp, K                                                                     | 293(2)                                                          |
| $\lambda$ , Å                                                               | 0.71073                                                         |
| $\mu$ , mm <sup>-1</sup>                                                    | 0.525                                                           |
| goodness-of-fit ( <i>F</i> <sup>2</sup> )                                   | 0.772                                                           |
| <i>F</i> (000)                                                              | 1568                                                            |
| reflections collected                                                       | 14034                                                           |
| independent reflections                                                     | 8700 [ <i>R</i> (int) = 0.0592]                                 |
| completeness to $\theta_{max}$ , %                                          | 96.4                                                            |
| data/parameters/restraints                                                  | 8700/217/0                                                      |
| $\theta$ range for data collection, deg                                     | 1.45 – 27.47                                                    |
| diffraction limits ( <i>h</i> , <i>k</i> , <i>l</i> )                       | -13 ≤ <i>h</i> ≤ 13, -36 ≤ <i>k</i> ≤ 27, -36 ≤ <i>l</i> ≤ 36   |
| refinement method                                                           | Full-matrix least squares on <i>F</i> <sup>2</sup>              |
| <i>R</i> <sub>1</sub> , <i>wR</i> <sub>2</sub> [ <i>I</i> > 2σ( <i>I</i> )] | 0.0794 <sup>a</sup> , 0.2084 <sup>b</sup>                       |
| <i>R</i> <sub>1</sub> , <i>wR</i> <sub>2</sub> (all data)                   | 0.1512 <sup>a</sup> , 0.2297 <sup>b</sup>                       |
| largest peak, hole, eÅ <sup>-3</sup>                                        | 0.793, -0.683                                                   |

<sup>a</sup> $R = \frac{\sum ||F_o| - |F_c||}{\sum |F_o|}$ . <sup>b</sup> $wR(F^2) = [\frac{\sum w(F_o^2 - F_c^2)^2}{\sum w(F_o^2)^2}]^{1/2}$  where  $w = 1/[\sigma^2(F_o^2) + (0.1225 P)^2 + (0.0000)P]$ ,  $P = (F_o^2 + 2F_c^2)/3$ .

**Table S2.** Bond Distances (Å) and Angles (deg) for SNU-21<sup>a</sup>.

|                    |            |                     |            |
|--------------------|------------|---------------------|------------|
| Cu(1)-O(2)         | 1.966(3)   | Cu(1)#2-O(3)        | 1.966(3)   |
| Cu(1)-O(5)         | 1.969(4)   | Cu(1)#2-O(6)        | 1.984(4)   |
| Cu(1)-O(3)#2       | 1.966(3)   | Cu(1)-O(6)#2        | 1.984(4)   |
| Cu(1)-Ow(1)        | 2.232(4)   | Cu(1)-Cu(1)#2       | 2.625(1)   |
| C(1)-C(10)         | 1.545(6)   | C(1)-C(10)#1        | 1.545(6)   |
| C(1)-C(2)#1        | 1.553(6)   | C(1)-C(2)           | 1.553(6)   |
| C(5)-C(6)          | 1.329(7)   | C(5)-C(4)           | 1.455(7)   |
| C(5)-H(5)          | 0.9300     | C(6)-C(7)           | 1.367(9)   |
| C(6)-C(9)          | 1.488(7)   | C(7)-C(8)           | 1.515(9)   |
| C(7)-H(7)          | 0.9300     | C(8)-C(3)           | 1.399(8)   |
| C(8)-H(8)          | 0.9300     | C(9)-O(3)           | 1.299(6)   |
| C(9)-O(2)          | 1.262(6)   | C(10)-O(4)          | 1.433(6)   |
| C(10)-H(10A)       | 0.9700     | C(10)-H(10B)        | 0.9700     |
| C(15)-C(16)        | 1.393(7)   | C(15)-C(14)         | 1.408(7)   |
| C(15)-H(15)        | 0.9300     | O(5)-C(17)          | 1.280(6)   |
| O(6)-C(17)         | 1.244(6)   | C(2)-O(1)#3         | 1.434(6)   |
| C(2)-H(2A)         | 0.9700     | C(2)-H(2B)          | 0.9700     |
| C(3)-C(4)          | 1.323(7)   | C(3)-O(1)           | 1.374(6)   |
| C(4)-H(4)          | 0.9300     | C(11)-C(16)         | 1.370(7)   |
| C(11)-O(4)         | 1.386(6)   | C(11)-C(12)         | 1.401(7)   |
| C(12)-C(13)        | 1.449(7)   | C(12)-H(12)         | 0.9300     |
| C(13)-C(14)        | 1.349(7)   | C(13)-H(13)         | 0.9300     |
| C(14)-C(17)        | 1.491(7)   | C(16)-H(16)         | 0.9300     |
| O(1)-C(2)#3        | 1.434(6)   |                     |            |
| O(3)#2-Cu(1)-O(5)  | 88.84(14)  | O(3)#2-Cu(1)-O(6)#2 | 90.46(15)  |
| O(5)-Cu(1)-O(6)#2  | 168.76(16) | O(3)#2-Cu(1)-O2     | 168.58(17) |
| O(5)-Cu(1)-O(2)    | 89.85(15)  | O(6)#2-Cu(1)-O(2)   | 88.62(15)  |
| O(3)#2-Cu(1)-Ow(1) | 101.41(18) | O(5)-Cu(1)-Ow(1)    | 99.56(16)  |
| O(6)#2-Cu(1)-Ow(1) | 91.58(17)  | O(2)-Cu(1)-Ow(1)    | 89.99(18)  |



| Supplementary Material (ESI) for <i>Chemical Communications</i><br>This journal is (c) The Royal Society of Chemistry 2011 |            |                     |           |
|----------------------------------------------------------------------------------------------------------------------------|------------|---------------------|-----------|
| O(3)#2-Cu(1)-Cu(1)#2                                                                                                       | 85.40(12)  | O(3)-Cu(1)-Cu(1)#2  | 85.40(12) |
| O(6)#2-Cu(1)-Cu(1)#2                                                                                                       | 83.37(13)  | O(2)-Cu(1)-Cu(1)#2  | 81.46(13) |
| Ow(1)-Cu(1)-Cu(1)#1                                                                                                        | 170.14(14) | C(10)-C(1)-C(10)#1  | 111.1(5)  |
| C(10)-C(1)-C(2)#1                                                                                                          | 107.1(3)   | C(10)#1-C(1)-C(2)#1 | 108.8(3)  |
| C(10)-C(1)-C(2)                                                                                                            | 108.8(3)   | C(10)#1-C(1)-C(2)   | 107.1(3)  |
| C(2)#1-C(1)-C(2)                                                                                                           | 113.9(5)   | C(6)-C(5)-C(4)      | 121.9(6)  |
| C(6)-C(5)-H(5)                                                                                                             | 119.0      | C(4)-C(5)-H(5)      | 119.0     |
| C(5)-C(6)-C(7)                                                                                                             | 118.1(6)   | C(5)-C(6)-C(9)      | 124.7(6)  |
| C(7)-C(6)-C(9)                                                                                                             | 117.2(6)   | C(6)-C(7)-C(8)      | 123.2(6)  |
| C(6)-C(7)-H(7)                                                                                                             | 118.4      | C(8)-C(7)-H(7)      | 118.4     |
| C(3)-C(8)-C(7)                                                                                                             | 113.3(6)   | C(3)-C(8)-H(8)      | 123.4     |
| C(7)-C(8)-H(8)                                                                                                             | 123.4      | O(3)-C(9)-O(2)      | 127.1(5)  |
| O(3)-C(9)-C(6)                                                                                                             | 116.3(6)   | O(2)-C(9)-C(6)      | 116.5(6)  |
| O(4)-C(10)-C(1)                                                                                                            | 105.9(4)   | O(4)-C(10)-H(10A)   | 110.5     |
| C(1)-C(10)-H(10A)                                                                                                          | 110.5      | O(4)-C(10)-H(10B)   | 110.5     |
| C(1)-C(10)-H(10B)                                                                                                          | 110.5      | H(10A)-C(10)-H(10B) | 108.7     |
| C(16)-C(15)-C(14)                                                                                                          | 123.5(6)   | C(16)-C(15)-H(15)   | 118.2     |
| C(14)-C(15)-H(15)                                                                                                          | 118.2      | C(9)-O(2)-Cu(1)     | 124.5(4)  |
| C(9)-O(3)-Cu(1)#2                                                                                                          | 119.7(4)   | C(17)-O(5)-Cu(1)    | 121.9(4)  |
| C(17)-O(6)-Cu(1)#2                                                                                                         | 124.4(4)   | O(1)#3-C(2)-C(1)    | 105.3(4)  |
| O(1)#3-C(2)-H(2A)                                                                                                          | 110.7      | C(1)-C(2)-H(2A)     | 110.7     |
| O(1)#3-C(2)-H(2B)                                                                                                          | 110.7      | C(1)-C(2)-H(2B)     | 110.7     |
| H(2A)-C(2)-H(2B)                                                                                                           | 108.8      | C(4)-C(3)-O(1)      | 127.1(6)  |
| C(4)-C(3)-C(8)                                                                                                             | 123.2(6)   | O(1)-C(3)-C(8)      | 109.5(6)  |
| C(3)-C(4)-C(5)                                                                                                             | 120.0(6)   | C(3)-C(4)-C(H4)     | 120.0     |
| C(5)-C(4)-H(4)                                                                                                             | 120.0      | C(16)-C(11)-O(4)    | 125.9(5)  |
| C(16)-C(11)-C(12)                                                                                                          | 124.2(6)   | O(4)-C(11)-C(12)    | 109.7(6)  |
| C(11)-C(12)-C(13)                                                                                                          | 115.9(6)   | C(11)-C(12)-H(12)   | 122.0     |
| C(13)-C(12)-H(12)                                                                                                          | 122.0      | C(14)-C(13)-C(12)   | 122.0(6)  |
| C(14)-C(13)-H(13)                                                                                                          | 119.0      | C(12)-C(13)-H(13)   | 119.0     |

| Supplementary Material (ESI) for Chemical Communications<br>This journal is (c) The Royal Society of Chemistry 2011 |          |                   |          |
|---------------------------------------------------------------------------------------------------------------------|----------|-------------------|----------|
| C(13)-C(14)-C(15)                                                                                                   | 122.1(6) | C(13)-C(14)-C(15) | 122.1(6) |
| C(15)-C(14)-C(17)                                                                                                   | 119.8(6) | C(11)-C(16)-C(15) | 116.3(6) |
| C(11)-C(16)-H(16)                                                                                                   | 121.9    | C(15)-C(16)-H(16) | 121.9    |
| O(6)-C(17)-O(5)                                                                                                     | 124.9(6) | O(6)-C(17)-C(14)  | 119.0(6) |
| O(5)-C(17)-C(14)                                                                                                    | 116.0(6) | C(3)-O(1)-C(2)#3  | 116.5(5) |
| C(11)-O(4)-C(10)                                                                                                    | 115.9(5) |                   |          |

<sup>a</sup> Symmetry transformation used to generate equivalent atoms: #1, -x+2, y, -z+1/2; #2, -x+2, -y+1, -z; #3, -x+3/2, -y+3/2, -z

**Table S3.** Comparison of Gas Adsorption Data of SNU-21H and SNU-21S

| Gas             | <i>T</i> (K) | <i>P</i> (bar) | surface area                 |         | Pore volume                   |         | Adsorption capacity |         |                    |         |      |
|-----------------|--------------|----------------|------------------------------|---------|-------------------------------|---------|---------------------|---------|--------------------|---------|------|
|                 |              |                | $(\text{m}^2 \text{g}^{-1})$ |         | $(\text{cm}^3 \text{g}^{-1})$ |         | wt% gas             |         | mmol of gas/g host |         |      |
|                 |              |                | SNU-21H                      | SNU-21S | SNU-21H                       | SNU-21S | SNU-21H             | SNU-21S | SNU-21H            | SNU-21S |      |
| N <sub>2</sub>  | 77           | 0.9            | 695                          | 905     | 0.25                          | 0.31    | 24.9                | 31.5    | 8.91               | 11.3    |      |
| O <sub>2</sub>  | 77           | 0.2            |                              |         |                               |         | 42.0                | 48.6    | 13.1               | 15.2    |      |
| H <sub>2</sub>  | 77           | 1.0            |                              |         |                               |         | 1.64                | 1.95    | 8.13               | 9.66    |      |
|                 |              | 70             |                              |         |                               |         | 4.36                | 4.37    | 21.6               | 21.7    |      |
|                 |              |                |                              |         |                               |         | (4.95)              | (5.10)  | (24.6)             | (25.3)  |      |
|                 | 87           | 1.0            |                              |         |                               |         | 1.11                | 1.46    | 5.51               | 7.22    |      |
| CO <sub>2</sub> | 195          | 298            | 934                          | 1908    | 0.33                          | 0.68    | 45.9                | 50.5    | 10.4               | 11.5    |      |
|                 |              | 273            | 1.0                          |         |                               |         |                     | 17.1    | 18.4               | 3.88    | 4.17 |
|                 |              | 298            | 1.0                          |         |                               |         |                     | 9.65    | 11.1               | 2.19    | 2.52 |
| CH <sub>4</sub> | 195          | 45             |                              |         |                               |         | 24.9                | 27.2    | 5.66               | 6.18    |      |
|                 |              | 1.0            |                              |         |                               |         | 7.62                | 8.86    | 4.75               | 5.53    |      |
|                 |              | 273            | 1.0                          |         |                               |         |                     | 1.87    | 1.97               | 1.17    | 1.23 |
|                 |              | 298            | 1.0                          |         |                               |         |                     | 1.07    | 1.17               | 0.67    | 0.73 |
|                 |              | 50             |                              |         |                               |         | 5.32                | 6.38    | 3.31               | 3.98    |      |

**Table S4.** The N<sub>2</sub> and O<sub>2</sub> Adsorption and Desorption Data of SNU-21H and SNU-21S.

| N <sub>2</sub> at 77 K for <b>SNU-21H</b> |                            | N <sub>2</sub> at 77 K for <b>SNU-21S</b> |                            | O <sub>2</sub> at 77 K for <b>SNU-21H</b> |                            | O <sub>2</sub> at 77 K for <b>SNU-21S</b> |                            |
|-------------------------------------------|----------------------------|-------------------------------------------|----------------------------|-------------------------------------------|----------------------------|-------------------------------------------|----------------------------|
| $P/P_0^a$                                 | $V_{ads}/\text{cc g}^{-1}$ |
| 1.10E-04                                  | 91.7036                    | 1.78E-04                                  | 151.4398                   | 4.46E-04                                  | 181.6421                   | 4.46E-04                                  | 203.9469                   |
| 2.26E-04                                  | 101.0453                   | 2.66E-04                                  | 154.2471                   | 9.59E-04                                  | 192.1317                   | 9.61E-04                                  | 216.3098                   |
| 4.08E-04                                  | 106.064                    | 3.74E-04                                  | 157.3715                   | 1.48E-03                                  | 198.8282                   | 1.48E-03                                  | 224.0363                   |
| 4.42E-04                                  | 107.8577                   | 5.15E-04                                  | 160.2783                   | 2.00E-03                                  | 202.6711                   | 2.00E-03                                  | 228.4093                   |
| 5.40E-04                                  | 109.8929                   | 6.48E-04                                  | 162.267                    | 2.54E-03                                  | 205.0508                   | 2.52E-03                                  | 231.1687                   |
| 6.49E-04                                  | 111.9478                   | 6.38E-04                                  | 162.286                    | 3.04E-03                                  | 208.0574                   | 3.05E-03                                  | 234.3911                   |
| 7.65E-04                                  | 113.9714                   | 9.66E-04                                  | 165.1168                   | 3.57E-03                                  | 209.5384                   | 3.57E-03                                  | 236.1317                   |
| 9.07E-04                                  | 115.9063                   | 9.34E-04                                  | 165.0812                   | 4.09E-03                                  | 210.8709                   | 4.09E-03                                  | 237.6183                   |
| 1.07E-03                                  | 117.611                    | 9.43E-04                                  | 165.0914                   | 4.60E-03                                  | 212.0946                   | 4.60E-03                                  | 239.285                    |
| 1.04E-03                                  | 117.6385                   | 1.38E-03                                  | 167.6543                   | 5.12E-03                                  | 215.4601                   | 5.13E-03                                  | 240.578                    |
| 2.14E-03                                  | 125.147                    | 2.50E-03                                  | 172.0222                   | 1.03E-02                                  | 221.8104                   | 1.03E-02                                  | 248.1156                   |
| 3.18E-03                                  | 129.0681                   | 3.16E-03                                  | 173.8082                   | 1.55E-02                                  | 226.6355                   | 1.55E-02                                  | 252.2097                   |
| 4.33E-03                                  | 131.4593                   | 4.36E-03                                  | 176.1195                   | 2.06E-02                                  | 230.787                    | 2.09E-02                                  | 255.4745                   |
| 5.39E-03                                  | 134.4431                   | 5.26E-03                                  | 177.6756                   | 2.58E-02                                  | 233.216                    | 2.57E-02                                  | 257.6351                   |
| 6.32E-03                                  | 136.1599                   | 6.29E-03                                  | 179.3289                   | 3.10E-02                                  | 235.6299                   | 3.15E-02                                  | 259.6929                   |
| 7.44E-03                                  | 137.5085                   | 7.34E-03                                  | 180.9692                   | 3.63E-02                                  | 237.5084                   | 3.61E-02                                  | 261.2285                   |
| 8.55E-03                                  | 138.85                     | 8.85E-03                                  | 183.1878                   | 4.15E-02                                  | 239.516                    | 4.15E-02                                  | 262.8192                   |
| 9.41E-03                                  | 140.8912                   | 9.71E-03                                  | 184.2136                   | 4.64E-02                                  | 240.9964                   | 4.74E-02                                  | 264.291                    |
| 1.23E-02                                  | 141.706                    | 1.12E-02                                  | 186.4                      | 5.20E-02                                  | 242.4575                   | 5.31E-02                                  | 265.7782                   |
| 2.12E-02                                  | 146.1923                   | 2.12E-02                                  | 192.876                    | 1.08E-01                                  | 249.6736                   | 1.12E-01                                  | 272.8508                   |
| 3.13E-02                                  | 150.322                    | 3.22E-02                                  | 197.4398                   | 1.67E-01                                  | 254.8058                   | 1.74E-01                                  | 277.8206                   |
| 4.09E-02                                  | 152.8428                   | 4.15E-02                                  | 200.2063                   | 1.66E-01                                  | 255.4057                   | 1.71E-01                                  | 277.8985                   |
| 5.84E-02                                  | 156.0783                   | 5.99E-02                                  | 203.8937                   | 2.07E-01                                  | 258.3752                   | 2.12E-01                                  | 280.6862                   |
| 6.42E-02                                  | 157.064                    | 6.41E-02                                  | 204.8742                   | 2.97E-01                                  | 263.1662                   | 3.02E-01                                  | 285.6606                   |
| 7.41E-02                                  | 158.2992                   | 7.41E-02                                  | 206.3936                   | 3.18E-01                                  | 264.4316                   | 3.20E-01                                  | 286.7581                   |
| 8.49E-02                                  | 159.4415                   | 8.43E-02                                  | 207.853                    | 3.65E-01                                  | 266.5552                   | 3.68E-01                                  | 289.0598                   |
| 9.54E-02                                  | 160.4615                   | 9.51E-02                                  | 209.2244                   | 4.35E-01                                  | 269.2059                   | 4.37E-01                                  | 292.1479                   |
| 1.14E-01                                  | 161.8607                   | 1.14E-01                                  | 210.9719                   | 4.29E-01                                  | 269.3762                   | 4.31E-01                                  | 292.162                    |

|          |          |          |          |          |          |          |          |
|----------|----------|----------|----------|----------|----------|----------|----------|
| 1.64E-01 | 164.7816 | 1.65E-01 | 164.4964 | 4.71E-01 | 270.6983 | 4.72E-01 | 293.9966 |
| 2.17E-01 | 167.5555 | 2.17E-01 | 217.6371 | 5.63E-01 | 273.699  | 5.64E-01 | 297.8018 |
| 2.69E-01 | 170.0648 | 2.69E-01 | 220.324  | 6.82E-01 | 278.091  | 6.87E-01 | 303.1942 |
| 3.21E-01 | 172.4415 | 3.22E-01 | 222.6873 | 8.16E-01 | 281.8988 | 8.11E-01 | 309.6956 |
| 3.73E-01 | 174.7772 | 3.74E-01 | 224.9195 | 9.43E-01 | 286.1301 | 9.23E-01 | 319.7641 |
| 4.26E-01 | 176.9283 | 4.26E-01 | 227.0665 | 1.05E+00 | 293.8846 | 1.01E+00 | 340.4617 |
| 4.78E-01 | 179.1577 | 4.78E-01 | 229.0457 | 8.74E-01 | 285.2969 | 9.08E-01 | 322.1176 |
| 5.30E-01 | 181.228  | 5.31E-01 | 230.8475 | 7.24E-01 | 281.5608 | 7.44E-01 | 311.6411 |
| 5.82E-01 | 183.425  | 5.83E-01 | 232.8163 | 5.94E-01 | 278.4072 | 6.01E-01 | 305.3952 |
| 6.35E-01 | 185.4948 | 6.35E-01 | 234.5728 | 4.66E-01 | 275.0514 | 4.69E-01 | 300.082  |
| 6.86E-01 | 187.6541 | 6.87E-01 | 236.4878 | 3.41E-01 | 271.0452 | 3.41E-01 | 294.705  |
| 7.39E-01 | 189.7074 | 7.38E-01 | 238.6348 | 2.26E-01 | 265.181  | 2.29E-01 | 285.9381 |
| 7.91E-01 | 191.7799 | 7.91E-01 | 240.8896 | 1.25E-01 | 258.6467 | 1.22E-01 | 278.5766 |
| 8.43E-01 | 194.0324 | 8.43E-01 | 243.4516 |          |          |          |          |
| 8.95E-01 | 196.4049 | 8.94E-01 | 246.914  |          |          |          |          |
| 9.45E-01 | 199.4912 | 9.44E-01 | 252.0167 |          |          |          |          |
| 8.91E-01 | 196.7134 | 8.87E-01 | 247.7973 |          |          |          |          |
| 8.36E-01 | 194.461  | 8.29E-01 | 245.0611 |          |          |          |          |
| 7.81E-01 | 192.4742 | 7.72E-01 | 243.0131 |          |          |          |          |
| 7.25E-01 | 190.5291 | 7.20E-01 | 241.3905 |          |          |          |          |
| 6.69E-01 | 188.6676 | 6.67E-01 | 239.9412 |          |          |          |          |
| 6.17E-01 | 186.8566 | 6.15E-01 | 238.6498 |          |          |          |          |
| 5.65E-01 | 185.181  | 5.63E-01 | 237.2977 |          |          |          |          |
| 5.13E-01 | 183.3651 | 5.11E-01 | 235.9091 |          |          |          |          |
| 4.61E-01 | 181.3074 | 4.61E-01 | 232.6082 |          |          |          |          |
| 4.09E-01 | 179.4547 | 4.07E-01 | 231.0729 |          |          |          |          |
| 3.56E-01 | 177.6915 | 3.55E-01 | 229.5118 |          |          |          |          |
| 3.04E-01 | 175.8014 | 3.02E-01 | 227.9701 |          |          |          |          |
| 2.52E-01 | 173.9764 | 2.51E-01 | 226.0914 |          |          |          |          |
| 2.00E-01 | 172.0816 | 1.98E-01 | 224.2    |          |          |          |          |
| 1.48E-01 | 169.9758 | 1.47E-01 | 221.6534 |          |          |          |          |

<sup>a</sup> $P_o$  values of N<sub>2</sub> and O<sub>2</sub> are 0.9588 and 0.1945 atm, respectively.

**Table S5.** The H<sub>2</sub> Adsorption and Desorption Data of SNU-21H and SNU-21S.

| H <sub>2</sub> at 77 K of SNU-21H |                                     | H <sub>2</sub> at 77 K of SNU-21S |                                     | H <sub>2</sub> at 87 K of SNU-21H |                                     | H <sub>2</sub> at 87 K of SNU-21S |                                     |
|-----------------------------------|-------------------------------------|-----------------------------------|-------------------------------------|-----------------------------------|-------------------------------------|-----------------------------------|-------------------------------------|
| $P / \text{atm}$                  | $V_{\text{ads}} / \text{cc g}^{-1}$ | $P / \text{atm}$                  | $V_{\text{ads}} / \text{cc g}^{-1}$ | $P / \text{atm}$                  | $V_{\text{ads}} / \text{cc g}^{-1}$ | $P / \text{atm}$                  | $V_{\text{ads}} / \text{cc g}^{-1}$ |
| 9.83E-05                          | 0.0285                              | 9.86E-05                          | 0.0433                              | 1.06E-04                          | 0.0213                              | 1.24E-04                          | 0.0068                              |
| 1.97E-04                          | 0.1442                              | 2.04E-04                          | 0.2168                              | 1.96E-04                          | 0.0533                              | 2.03E-04                          | 0.0403                              |
| 2.97E-04                          | 0.2563                              | 3.03E-04                          | 0.3723                              | 3.39E-04                          | 0.105                               | 2.95E-04                          | 0.0891                              |
| 4.21E-04                          | 0.3989                              | 4.04E-04                          | 0.5217                              | 4.02E-04                          | 0.1263                              | 4.40E-04                          | 0.1713                              |
| 4.97E-04                          | 0.4848                              | 5.03E-04                          | 0.6732                              | 5.37E-04                          | 0.1756                              | 5.05E-04                          | 0.2014                              |
| 6.23E-04                          | 0.626                               | 6.04E-04                          | 0.824                               | 6.01E-04                          | 0.1981                              | 5.95E-04                          | 0.2435                              |
| 6.98E-04                          | 0.7101                              | 7.05E-04                          | 0.9824                              | 7.38E-04                          | 0.2477                              | 7.51E-04                          | 0.3233                              |
| 8.22E-04                          | 0.8497                              | 8.03E-04                          | 1.123                               | 8.01E-04                          | 0.2693                              | 8.00E-04                          | 0.3494                              |
| 8.98E-04                          | 0.9342                              | 9.07E-04                          | 1.2759                              | 9.37E-04                          | 0.3179                              | 9.41E-04                          | 0.4251                              |
| 1.02E-03                          | 1.0743                              | 1.00E-03                          | 1.419                               | 1.00E-03                          | 0.3409                              | 1.00E-03                          | 0.4553                              |
| 2.14E-03                          | 2.2651                              | 2.08E-03                          | 3.014                               | 2.06E-03                          | 0.7266                              | 2.16E-03                          | 1.0819                              |
| 3.09E-03                          | 3.2726                              | 3.09E-03                          | 4.4699                              | 3.04E-03                          | 1.0822                              | 3.05E-03                          | 1.5592                              |
| 4.10E-03                          | 4.3484                              | 4.11E-03                          | 5.9343                              | 4.01E-03                          | 1.4312                              | 4.02E-03                          | 2.0771                              |
| 5.15E-03                          | 5.4467                              | 5.02E-03                          | 7.2084                              | 5.06E-03                          | 1.8094                              | 5.04E-03                          | 2.6064                              |
| 6.15E-03                          | 6.4553                              | 6.11E-03                          | 8.6274                              | 6.03E-03                          | 2.1571                              | 6.15E-03                          | 3.1857                              |
| 7.09E-03                          | 7.4386                              | 7.04E-03                          | 9.9218                              | 7.04E-03                          | 2.5154                              | 7.09E-03                          | 3.6693                              |
| 8.74E-03                          | 9.0349                              | 8.83E-03                          | 12.3113                             | 8.53E-03                          | 3.0335                              | 8.58E-03                          | 4.4333                              |
| 9.22E-03                          | 9.5155                              | 9.30E-03                          | 12.9365                             | 9.36E-03                          | 3.3278                              | 9.35E-03                          | 4.8174                              |
| 1.09E-02                          | 11.1348                             | 1.12E-02                          | 15.217                              | 1.18E-02                          | 4.2337                              | 1.20E-02                          | 4.5628                              |
| 1.96E-02                          | 18.9088                             | 2.02E-02                          | 25.9707                             | 1.98E-02                          | 6.8637                              | 2.00E-02                          | 8.5384                              |
| 2.94E-02                          | 27.0676                             | 3.04E-02                          | 36.4538                             | 2.92E-02                          | 9.8847                              | 3.19E-02                          | 13.9438                             |
| 3.95E-02                          | 34.6953                             | 4.03E-02                          | 45.9629                             | 3.91E-02                          | 12.9608                             | 4.00E-02                          | 17.5028                             |
| 4.96E-02                          | 41.7313                             | 5.01E-02                          | 54.7643                             | 4.91E-02                          | 15.98                               | 5.18E-02                          | 22.4998                             |

|          |          |          |          |          |          |          |          |
|----------|----------|----------|----------|----------|----------|----------|----------|
| 5.67E-02 | 46.297   | 5.90E-02 | 60.7846  | 5.92E-02 | 18.9215  | 5.99E-02 | 25.9665  |
| 6.93E-02 | 53.8942  | 7.02E-02 | 69.7629  | 6.93E-02 | 21.7787  | 6.94E-02 | 29.6907  |
| 7.72E-02 | 57.9588  | 8.10E-02 | 75.7738  | 7.94E-02 | 24.5412  | 7.98E-02 | 32.9171  |
| 8.68E-02 | 62.5321  | 9.17E-02 | 81.3403  | 8.94E-02 | 27.2141  | 9.05E-02 | 36.0218  |
| 1.03E-01 | 69.6022  | 1.06E-01 | 88.9982  | 1.07E-01 | 31.4363  | 1.08E-01 | 41.4608  |
| 1.42E-01 | 84.6102  | 1.48E-01 | 106.4548 | 1.50E-01 | 41.1096  | 1.53E-01 | 54.2891  |
| 1.92E-01 | 99.4703  | 1.98E-01 | 123.0606 | 1.99E-01 | 50.9728  | 2.03E-01 | 66.729   |
| 2.57E-01 | 114.4294 | 2.51E-01 | 136.3176 | 2.50E-01 | 59.75    | 2.54E-01 | 77.8728  |
| 3.00E-01 | 122.5714 | 3.03E-01 | 147.2376 | 3.01E-01 | 67.5937  | 3.04E-01 | 87.7986  |
| 3.51E-01 | 130.7008 | 3.54E-01 | 156.2041 | 3.53E-01 | 74.4492  | 3.55E-01 | 96.7389  |
| 4.02E-01 | 137.5417 | 4.05E-01 | 163.505  | 4.03E-01 | 80.6461  | 4.06E-01 | 104.3683 |
| 4.54E-01 | 143.4448 | 4.52E-01 | 173.7778 | 4.54E-01 | 86.0673  | 4.57E-01 | 111.4946 |
| 5.04E-01 | 148.9731 | 5.06E-01 | 180.5072 | 5.04E-01 | 91.1569  | 5.06E-01 | 118.0104 |
| 5.55E-01 | 153.7159 | 5.57E-01 | 186.0009 | 5.55E-01 | 95.6582  | 5.57E-01 | 123.9489 |
| 6.06E-01 | 157.9967 | 6.08E-01 | 190.8014 | 6.06E-01 | 99.8288  | 6.07E-01 | 129.2466 |
| 6.56E-01 | 161.9761 | 6.59E-01 | 194.9308 | 6.56E-01 | 103.6143 | 6.58E-01 | 134.4213 |
| 7.07E-01 | 165.6354 | 7.08E-01 | 199.0317 | 7.06E-01 | 107.2363 | 7.08E-01 | 139.1918 |
| 7.57E-01 | 169.0231 | 7.58E-01 | 202.6959 | 7.57E-01 | 110.4264 | 7.58E-01 | 143.8068 |
| 8.08E-01 | 172.0373 | 8.09E-01 | 205.7371 | 8.07E-01 | 113.4489 | 8.08E-01 | 147.8914 |
| 8.57E-01 | 174.9505 | 8.59E-01 | 208.8955 | 8.57E-01 | 116.1151 | 8.58E-01 | 152.1624 |
| 9.08E-01 | 177.5868 | 9.09E-01 | 211.4389 | 9.07E-01 | 118.8618 | 9.09E-01 | 155.5724 |
| 9.59E-01 | 180.0253 | 9.60E-01 | 214.2113 | 9.58E-01 | 121.2066 | 9.59E-01 | 158.8815 |
| 9.99E-01 | 182.1709 | 9.99E-01 | 216.4615 | 9.99E-01 | 123.3214 | 9.99E-01 | 161.69   |
| 9.45E-01 | 179.6761 | 9.45E-01 | 213.6543 | 9.44E-01 | 120.5742 | 9.45E-01 | 158.0434 |
| 8.91E-01 | 177.1739 | 8.90E-01 | 210.8887 | 8.91E-01 | 117.9651 | 8.91E-01 | 154.4516 |
| 8.41E-01 | 174.6805 | 8.40E-01 | 208.2208 | 8.41E-01 | 115.2994 | 8.41E-01 | 150.805  |
| 7.92E-01 | 171.8613 | 7.91E-01 | 204.8815 | 7.91E-01 | 112.5038 | 7.91E-01 | 146.762  |
| 7.43E-01 | 168.7577 | 7.41E-01 | 201.4615 | 7.42E-01 | 109.5132 | 7.42E-01 | 142.2742 |
| 6.92E-01 | 165.7912 | 6.91E-01 | 197.8398 | 6.92E-01 | 106.2212 | 6.91E-01 | 137.819  |
| 6.43E-01 | 162.394  | 6.41E-01 | 193.8489 | 6.42E-01 | 102.7022 | 6.42E-01 | 133.1199 |
| 5.93E-01 | 158.7082 | 5.92E-01 | 189.7738 | 5.93E-01 | 98.9525  | 5.92E-01 | 128.1308 |

5.44E-01 154.589 5.42E-01 179.7136 5.40E-01 94.08626 5.42E-01 122.7439  
 4.94E-01 150.0712 4.92E-01 179.7136 4.94E-01 90.4744 4.93E-01 116.828  
 4.46E-01 144.9239 4.44E-01 173.5086 4.44E-01 85.4462 4.44E-01 110.1982  
 3.96E-01 139.4379 3.93E-01 167.5181 3.92E-01 81.083 3.93E-01 103.3778  
 3.47E-01 133.0931 3.44E-01 159.7068 3.45E-01 75.2874 3.44E-01 95.7131  
 2.98E-01 125.5709 2.96E-01 150.7946 2.96E-01 68.5712 2.95E-01 87.1792  
 2.51E-01 116.6876 2.47E-01 140.0756 2.47E-01 60.9547 2.46E-01 77.1109  
 2.03E-01 106.3684 1.99E-01 127.4416 1.98E-01 52.4346 1.96E-01 66.4127  
 1.57E-01 93.8396 1.51E-01 111.6946 1.50E-01 42.7069 1.47E-01 54.0081  
 9.83E-02 72.1992 9.31E-02 86.1792 1.01E-01 31.5582 9.84E-02 39.6369

**Table S6.** The CO<sub>2</sub> Adsorption and Desorption Data of SNU-21H.

| CO <sub>2</sub> at 195 K of SNU-21H |                                             | CO <sub>2</sub> at 273 K of SNU-21H |                                             | CO <sub>2</sub> at 298 K of SNU-21H |                                             |
|-------------------------------------|---------------------------------------------|-------------------------------------|---------------------------------------------|-------------------------------------|---------------------------------------------|
| <i>P</i> / atm                      | <i>V</i> <sub>ads</sub> /cc g <sup>-1</sup> | <i>P</i> / atm                      | <i>V</i> <sub>ads</sub> /cc g <sup>-1</sup> | <i>P</i> / atm                      | <i>V</i> <sub>ads</sub> /cc g <sup>-1</sup> |
| 1.04E-04                            | 1.1765                                      | 6.04E-03                            | 0.0308                                      | 7.12E-03                            | 0.0261                                      |
| 1.94E-04                            | 2.0884                                      | 7.23E-03                            | 0.2059                                      | 9.37E-03                            | 0.1543                                      |
| 3.12E-04                            | 3.2282                                      | 9.30E-03                            | 0.453                                       | 1.01E-02                            | 0.1884                                      |
| 4.02E-04                            | 4.0766                                      | 1.01E-02                            | 0.5794                                      | 1.31E-02                            | 0.1061                                      |
| 5.01E-04                            | 4.9795                                      | 1.28E-02                            | 0.7315                                      | 2.23E-02                            | 0.6165                                      |
| 6.14E-04                            | 6.0231                                      | 2.12E-02                            | 1.9313                                      | 3.27E-02                            | 1.2371                                      |
| 7.02E-04                            | 6.8614                                      | 3.15E-02                            | 3.4286                                      | 4.25E-02                            | 1.829                                       |
| 8.13E-04                            | 7.8988                                      | 4.16E-02                            | 4.8756                                      | 6.14E-02                            | 2.9935                                      |
| 9.01E-04                            | 8.7252                                      | 5.96E-02                            | 7.529                                       | 6.31E-02                            | 3.106                                       |
| 1.09E-03                            | 9.5232                                      | 6.25E-02                            | 7.9557                                      | 7.27E-02                            | 3.6961                                      |
| 2.06E-03                            | 16.8482                                     | 7.17E-02                            | 9.28                                        | 8.27E-02                            | 4.3414                                      |
| 3.25E-03                            | 23.6091                                     | 8.18E-02                            | 10.7627                                     | 9.27E-02                            | 4.9793                                      |
| 4.06E-03                            | 28.0723                                     | 9.18E-02                            | 12.2335                                     | 1.11E-01                            | 6.083                                       |
| 5.10E-03                            | 34.035                                      | 1.10E-01                            | 14.7708                                     | 1.60E-01                            | 8.9995                                      |
| 6.14E-03                            | 40.1629                                     | 1.57E-01                            | 21.0802                                     | 2.10E-01                            | 12.0774                                     |



This journal is (c) The Royal Society of Chemistry 2011  
 Secondary Education (SE) for Chemical Computation

|          |          |          |         |          |         |
|----------|----------|----------|---------|----------|---------|
| 7.06E-03 | 45.2875  | 2.06E-01 | 27.6    | 2.60E-01 | 14.9033 |
| 8.07E-03 | 50.7659  | 2.57E-01 | 33.5848 | 3.10E-01 | 17.8403 |
| 9.17E-03 | 56.2588  | 3.07E-01 | 39.3361 | 3.60E-01 | 20.486  |
| 1.00E-02 | 81.4586  | 3.57E-01 | 44.4892 | 4.09E-01 | 23.2368 |
| 2.00E-02 | 119.4987 | 4.07E-01 | 49.437  | 4.60E-01 | 25.7004 |
| 2.94E-02 | 134.8271 | 4.58E-01 | 53.8241 | 5.10E-01 | 28.2474 |
| 4.10E-02 | 145.215  | 5.08E-01 | 58.1139 | 5.59E-01 | 30.6788 |
| 5.40E-02 | 152.7366 | 5.58E-01 | 61.8485 | 6.10E-01 | 33.0617 |
| 6.00E-02 | 155.5186 | 6.08E-01 | 65.5191 | 6.60E-01 | 35.1947 |
| 7.16E-02 | 159.7682 | 6.58E-01 | 68.8119 | 7.09E-01 | 37.4567 |
| 8.02E-02 | 162.4016 | 7.09E-01 | 72.0259 | 7.60E-01 | 39.4988 |
| 9.02E-02 | 165.0356 | 7.59E-01 | 74.7372 | 8.10E-01 | 41.4793 |
| 1.08E-01 | 168.8348 | 8.09E-01 | 77.5491 | 8.60E-01 | 43.4338 |
| 1.54E-01 | 175.9715 | 8.59E-01 | 79.9929 | 9.09E-01 | 45.463  |
| 2.06E-01 | 181.5968 | 9.09E-01 | 82.4306 | 9.60E-01 | 47.3439 |
| 2.57E-01 | 186.0824 | 9.59E-01 | 84.6716 | 9.99E-01 | 49.1065 |
| 3.08E-01 | 189.7036 | 9.99E-01 | 86.8027 | 9.40E-01 | 46.9168 |
| 3.58E-01 | 193.1083 | 9.40E-01 | 84.2425 | 8.89E-01 | 45.2984 |
| 4.09E-01 | 196.119  | 8.90E-01 | 82.2633 | 8.39E-01 | 43.6019 |
| 4.59E-01 | 198.9242 | 8.40E-01 | 79.9436 | 7.89E-01 | 42.0113 |
| 5.09E-01 | 201.6421 | 7.90E-01 | 77.6202 | 7.40E-01 | 40.0281 |
| 5.60E-01 | 203.9847 | 7.40E-01 | 75.032  | 6.89E-01 | 38.1907 |
| 6.09E-01 | 206.5511 | 6.91E-01 | 72.2578 | 6.40E-01 | 35.9708 |
| 6.60E-01 | 208.8485 | 6.41E-01 | 69.1779 | 5.90E-01 | 33.8619 |
| 7.09E-01 | 211.2008 | 5.91E-01 | 66.0229 | 5.40E-01 | 31.5404 |
| 7.60E-01 | 213.5048 | 5.42E-01 | 62.4026 | 4.90E-01 | 29.1938 |
| 8.10E-01 | 215.2369 | 4.92E-01 | 58.6019 | 4.40E-01 | 26.6421 |
| 8.59E-01 | 217.6121 | 4.42E-01 | 54.4118 | 3.90E-01 | 24.1646 |
| 9.10E-01 | 219.667  | 3.92E-01 | 50.0943 | 3.40E-01 | 21.5064 |
| 9.60E-01 | 221.7366 | 3.43E-01 | 45.2175 | 2.90E-01 | 18.7846 |
| 9.99E-01 | 223.6935 | 2.93E-01 | 40.0546 | 2.40E-01 | 15.8    |

|          |          |          |         |          |         |
|----------|----------|----------|---------|----------|---------|
| 9.44E-01 | 229.6019 | 2.40E-01 | 34.3288 | 1.90E-01 | 12.8019 |
| 8.89E-01 | 219.8678 | 1.93E-01 | 28.2535 | 1.40E-01 | 9.6838  |
| 8.39E-01 | 218.1337 | 1.43E-01 | 21.6318 | 9.02E-02 | 6.5589  |
| 7.89E-01 | 216.424  | 9.31E-02 | 14.6866 |          |         |
| 7.40E-01 | 214.3925 |          |         |          |         |
| 6.90E-01 | 212.4311 |          |         |          |         |
| 6.40E-01 | 210.3127 |          |         |          |         |
| 5.90E-01 | 208.2125 |          |         |          |         |
| 5.40E-01 | 205.9507 |          |         |          |         |
| 4.91E-01 | 203.5099 |          |         |          |         |
| 4.40E-01 | 201.0102 |          |         |          |         |
| 3.91E-01 | 198.215  |          |         |          |         |
| 3.41E-01 | 195.0925 |          |         |          |         |
| 2.92E-01 | 191.5923 |          |         |          |         |
| 2.42E-01 | 187.5968 |          |         |          |         |
| 1.93E-01 | 182.9288 |          |         |          |         |
| 1.44E-01 | 176.9868 |          |         |          |         |
| 9.69E-02 | 168.7092 |          |         |          |         |
| 5.28E-02 | 152.0788 |          |         |          |         |

**Table S7.** The CO<sub>2</sub> Adsorption and Desorption Data of SNU-21S  
 Supplementary Material (SM) for Chemical Communications  
 This journal is (c) The Royal Society of Chemistry 2011

| CO <sub>2</sub> at 195 K of SNU-21S |                                             | CO <sub>2</sub> at 273 K of SNU-21S |                                             | CO <sub>2</sub> at 298 K of SNU-21S |                                             |
|-------------------------------------|---------------------------------------------|-------------------------------------|---------------------------------------------|-------------------------------------|---------------------------------------------|
| <i>P</i> / atm                      | <i>V</i> <sub>ads</sub> /cc g <sup>-1</sup> | <i>P</i> / atm                      | <i>V</i> <sub>ads</sub> /cc g <sup>-1</sup> | <i>P</i> / atm                      | <i>V</i> <sub>ads</sub> /cc g <sup>-1</sup> |
| 1.08E-04                            | 1.414                                       | 5.05E-03                            | 0.0855                                      | 6.13E-03                            | 0.0045                                      |
| 1.95E-04                            | 2.2623                                      | 6.00E-03                            | 0.2042                                      | 7.13E-03                            | 0.0596                                      |
| 2.94E-04                            | 3.1508                                      | 7.08E-03                            | 0.3523                                      | 9.41E-03                            | 0.2099                                      |
| 4.14E-04                            | 4.2178                                      | 9.15E-03                            | 0.6349                                      | 1.01E-02                            | 0.2392                                      |
| 5.05E-04                            | 5.0035                                      | 1.00E-02                            | 0.772                                       | 1.29E-02                            | 0.7362                                      |
| 6.00E-04                            | 5.8339                                      | 1.29E-02                            | 1.0867                                      | 2.25E-02                            | 1.3192                                      |
| 6.98E-04                            | 6.6916                                      | 2.18E-02                            | 2.4642                                      | 3.22E-02                            | 2.0569                                      |
| 8.13E-04                            | 7.7369                                      | 3.15E-02                            | 3.9999                                      | 4.23E-02                            | 2.7026                                      |
| 9.03E-04                            | 8.5509                                      | 4.18E-02                            | 5.646                                       | 6.10E-02                            | 4.0563                                      |
| 1.09E-03                            | 9.2861                                      | 6.00E-02                            | 8.4904                                      | 6.26E-02                            | 4.3332                                      |
| 2.05E-03                            | 17.1403                                     | 6.25E-02                            | 9.0302                                      | 7.22E-02                            | 5.1099                                      |
| 3.02E-03                            | 25.4342                                     | 7.18E-02                            | 10.5317                                     | 8.21E-02                            | 5.7902                                      |
| 4.02E-03                            | 41.0648                                     | 8.18E-02                            | 12.1393                                     | 9.22E-02                            | 6.4169                                      |
| 5.04E-03                            | 50.5192                                     | 9.18E-02                            | 13.7608                                     | 1.11E-01                            | 7.6193                                      |
| 8.73E-03                            | 52.0369                                     | 1.10E-01                            | 16.4671                                     | 1.60E-01                            | 10.9146                                     |
| 7.06E-03                            | 53.8865                                     | 1.57E-01                            | 23.2086                                     | 2.09E-01                            | 14.3678                                     |
| 8.02E-03                            | 86.215                                      | 2.07E-01                            | 30.2211                                     | 2.60E-01                            | 17.4804                                     |
| 9.10E-03                            | 95.244                                      | 2.57E-01                            | 36.6462                                     | 3.09E-01                            | 20.7946                                     |
| 1.01E-02                            | 102.8186                                    | 3.07E-01                            | 42.8744                                     | 3.60E-01                            | 23.7055                                     |
| 2.17E-02                            | 141.912                                     | 3.58E-01                            | 48.3956                                     | 4.09E-01                            | 26.7716                                     |
| 3.09E-02                            | 154.7561                                    | 4.08E-01                            | 53.8083                                     | 4.60E-01                            | 29.5393                                     |
| 4.07E-02                            | 163.1378                                    | 4.58E-01                            | 58.6159                                     | 5.09E-01                            | 32.5828                                     |
| 5.52E-02                            | 171.416                                     | 5.08E-01                            | 63.1876                                     | 5.60E-01                            | 35.3593                                     |
| 6.09E-02                            | 173.9772                                    | 5.58E-01                            | 67.2439                                     | 6.09E-01                            | 38.0907                                     |
| 6.99E-02                            | 177.67                                      | 6.08E-01                            | 71.2486                                     | 6.60E-01                            | 40.5844                                     |
| 8.00E-02                            | 181.205                                     | 6.59E-01                            | 74.6962                                     | 7.09E-01                            | 43.1389                                     |
| 9.07E-02                            | 184.0679                                    | 7.10E-01                            | 77.629                                      | 7.59E-01                            | 45.4104                                     |
| 1.09E-01                            | 188.2177                                    | 7.60E-01                            | 80.4973                                     | 8.09E-01                            | 47.9217                                     |

Supplementary Material for Chemical Communications  
This journal is (c) The Royal Society of Chemistry 2011

|          |          |          |         |          |         |
|----------|----------|----------|---------|----------|---------|
| 1.55E-01 | 196.0693 | 8.09E-01 | 85.4539 | 8.59E-01 | 50.1047 |
| 2.07E-01 | 202.9113 | 8.60E-01 | 86.0544 | 9.09E-01 | 52.4324 |
| 2.57E-01 | 208.4892 | 9.09E-01 | 88.7668 | 9.59E-01 | 54.4224 |
| 3.08E-01 | 213.1042 | 9.59E-01 | 91.2245 | 9.99E-01 | 56.5476 |
| 3.58E-01 | 217.3495 | 9.99E-01 | 93.4509 | 9.38E-01 | 54.2175 |
| 4.09E-01 | 221.2124 | 9.99E-01 | 93.4509 | 8.88E-01 | 52.5029 |
| 4.59E-01 | 224.881  | 9.39E-01 | 90.6183 | 8.38E-01 | 50.4645 |
| 5.09E-01 | 228.2063 | 8.89E-01 | 88.4382 | 7.88E-01 | 48.446  |
| 5.60E-01 | 231.3992 | 8.39E-01 | 85.9294 | 7.38E-01 | 46.3552 |
| 6.10E-01 | 234.4987 | 7.89E-01 | 83.4745 | 6.88E-01 | 44.1796 |
| 6.60E-01 | 237.5484 | 7.39E-01 | 80.6438 | 6.39E-01 | 41.8121 |
| 7.10E-01 | 240.455  | 6.89E-01 | 77.7003 | 5.88E-01 | 39.5189 |
| 7.60E-01 | 243.3488 | 6.40E-01 | 74.3441 | 5.38E-01 | 36.7416 |
| 8.10E-01 | 246.1855 | 5.90E-01 | 70.8542 | 4.88E-01 | 34.1414 |
| 8.60E-01 | 248.9409 | 5.41E-01 | 66.7885 | 4.39E-01 | 31.272  |
| 9.10E-01 | 251.662  | 4.90E-01 | 62.7646 | 3.89E-01 | 28.4283 |
| 9.60E-01 | 254.4973 | 4.41E-01 | 58.2465 | 3.39E-01 | 25.2931 |
| 9.99E-01 | 257.0484 | 3.91E-01 | 53.5575 | 2.89E-01 | 22.2608 |
| 9.43E-01 | 254.418  | 3.42E-01 | 48.2731 | 2.39E-01 | 18.905  |
| 8.89E-01 | 252.0061 | 2.92E-01 | 42.7409 | 1.89E-01 | 15.6269 |
| 8.40E-01 | 249.6667 | 2.42E-01 | 36.6078 | 1.39E-01 | 12.1903 |
| 7.89E-01 | 247.3441 | 1.92E-01 | 30.1726 | 8.92E-02 | 8.63    |
| 7.39E-01 | 245.0175 | 1.43E-01 | 23.1624 |          |         |
| 6.90E-01 | 242.5645 | 9.23E-02 | 15.9824 |          |         |
| 6.40E-01 | 239.9194 |          |         |          |         |
| 5.90E-01 | 237.2305 |          |         |          |         |
| 5.40E-01 | 234.2796 |          |         |          |         |
| 4.90E-01 | 231.2231 |          |         |          |         |
| 4.40E-01 | 227.9247 |          |         |          |         |
| 3.91E-01 | 224.4583 |          |         |          |         |
| 3.41E-01 | 220.6626 |          |         |          |         |

|          |          |                                                                                                                     |
|----------|----------|---------------------------------------------------------------------------------------------------------------------|
| 2.91E-01 | 216.0777 | Supplementary Material (ESI) for Chemical Communications<br>This journal is (c) The Royal Society of Chemistry 2011 |
| 2.42E-01 | 211.6559 |                                                                                                                     |
| 1.92E-01 | 206.0182 |                                                                                                                     |
| 1.44E-01 | 198.9926 |                                                                                                                     |
| 9.61E-02 | 189.1929 |                                                                                                                     |
| 5.02E-02 | 171.035  |                                                                                                                     |

**Table S8.** The CH<sub>4</sub> Adsorption and Desorption Data of SNU-21H.

| CH <sub>4</sub> at 195 K of SNU-21H |                                              | CH <sub>4</sub> at 273 K of SNU-21H |                                              | CH <sub>4</sub> at 298 K of SNU-21H |                                              |
|-------------------------------------|----------------------------------------------|-------------------------------------|----------------------------------------------|-------------------------------------|----------------------------------------------|
| <i>P</i> / atm                      | <i>V</i> <sub>ads</sub> / cc g <sup>-1</sup> | <i>P</i> / atm                      | <i>V</i> <sub>ads</sub> / cc g <sup>-1</sup> | <i>P</i> / atm                      | <i>V</i> <sub>ads</sub> / cc g <sup>-1</sup> |
| 1.04E-04                            | 0.9                                          | 5.01E-03                            | 0.0208                                       | 2.28E-02                            | 0.1059                                       |
| 2.10E-04                            | 1.4942                                       | 6.08E-03                            | 0.0496                                       | 3.27E-02                            | 0.2641                                       |
| 3.14E-04                            | 1.8342                                       | 7.01E-03                            | 0.0744                                       | 4.28E-02                            | 0.4213                                       |
| 4.09E-04                            | 2.0149                                       | 9.11E-03                            | 0.1471                                       | 6.18E-02                            | 0.7683                                       |
| 5.37E-04                            | 2.1247                                       | 9.88E-03                            | 0.1703                                       | 6.29E-02                            | 0.7563                                       |
| 6.22E-04                            | 2.1507                                       | 2.30E-02                            | 0.3437                                       | 7.27E-02                            | 0.9153                                       |
| 7.06E-04                            | 2.1635                                       | 3.31E-02                            | 0.8095                                       | 8.26E-02                            | 1.0885                                       |
| 8.20E-04                            | 2.1964                                       | 4.33E-02                            | 1.1173                                       | 9.22E-02                            | 1.268                                        |
| 9.08E-04                            | 2.2338                                       | 6.17E-02                            | 1.8294                                       | 1.12E-01                            | 1.592                                        |
| 1.15E-03                            | 2.078                                        | 6.32E-02                            | 1.9069                                       | 1.61E-01                            | 2.4542                                       |
| 2.14E-03                            | 2.5064                                       | 7.28E-02                            | 2.2156                                       | 2.11E-01                            | 3.3962                                       |
| 3.18E-03                            | 2.9594                                       | 8.29E-02                            | 2.6132                                       | 2.61E-01                            | 4.206                                        |
| 4.24E-03                            | 3.3767                                       | 9.30E-02                            | 2.862                                        | 3.11E-01                            | 5.0961                                       |
| 5.31E-03                            | 3.7703                                       | 1.12E-01                            | 3.4797                                       | 3.61E-01                            | 5.8682                                       |
| 6.15E-03                            | 4.0385                                       | 1.61E-01                            | 5.2826                                       | 4.11E-01                            | 6.7572                                       |
| 7.05E-03                            | 4.5121                                       | 2.11E-01                            | 6.9145                                       | 4.61E-01                            | 7.4647                                       |
| 8.07E-03                            | 5.0539                                       | 2.61E-01                            | 8.4165                                       | 5.11E-01                            | 8.2829                                       |
| 9.11E-03                            | 5.6144                                       | 3.11E-01                            | 9.9995                                       | 5.61E-01                            | 8.9701                                       |
| 1.01E-02                            | 6.1738                                       | 3.61E-01                            | 11.203                                       | 6.11E-01                            | 9.7426                                       |

Supplementary Material (ESI) for Chemical Communications  
This journal is (c) The Royal Society of Chemistry 2011

|          |          |          |         |          |         |
|----------|----------|----------|---------|----------|---------|
| 1.92E-02 | 10.079   | 4.1E-01  | 12.0764 | 6.61E-01 | 10.3647 |
| 2.91E-02 | 16.0052  | 4.61E-01 | 13.9816 | 7.11E-01 | 11.111  |
| 3.93E-02 | 20.6205  | 5.11E-01 | 15.5263 | 7.61E-01 | 11.7198 |
| 5.65E-02 | 27.3712  | 5.62E-01 | 16.8319 | 8.10E-01 | 12.463  |
| 6.14E-02 | 29.2707  | 6.11E-01 | 18.1127 | 8.61E-01 | 13.0005 |
| 7.05E-02 | 32.3498  | 6.61E-01 | 19.2257 | 9.11E-01 | 13.6983 |
| 8.03E-02 | 35.4693  | 7.11E-01 | 20.5808 | 9.61E-01 | 14.2613 |
| 9.04E-02 | 38.4485  | 7.61E-01 | 21.4446 | 9.99E-01 | 14.9616 |
| 1.08E-01 | 43.047   | 8.11E-01 | 22.4959 | 9.99E-01 | 14.9616 |
| 1.54E-01 | 52.4703  | 8.61E-01 | 23.3671 | 9.38E-01 | 14.0027 |
| 2.05E-01 | 60.4372  | 9.12E-01 | 24.458  | 8.88E-01 | 13.3764 |
| 2.56E-01 | 66.9268  | 9.61E-01 | 25.1154 | 8.38E-01 | 12.7564 |
| 3.07E-01 | 72.1012  | 9.99E-01 | 26.1004 | 7.88E-01 | 12.1254 |
| 3.58E-01 | 76.6706  | 9.39E-01 | 24.8201 | 7.38E-01 | 11.4423 |
| 4.08E-01 | 80.5521  | 8.89E-01 | 23.9729 | 6.88E-01 | 10.7696 |
| 4.59E-01 | 83.9441  | 8.39E-01 | 22.9793 | 6.38E-01 | 10.0839 |
| 5.09E-01 | 87.0036  | 7.89E-01 | 22.0278 | 5.88E-01 | 9.389   |
| 5.59E-01 | 89.6594  | 7.39E-01 | 21.0665 | 5.39E-01 | 8.6612  |
| 6.10E-01 | 92.1667  | 6.89E-01 | 19.9745 | 4.88E-01 | 7.9082  |
| 6.60E-01 | 94.4453  | 6.39E-01 | 18.7376 | 4.38E-01 | 7.1446  |
| 7.10E-01 | 96.5592  | 5.89E-01 | 17.555  | 3.88E-01 | 6.3527  |
| 7.60E-01 | 98.5094  | 5.40E-01 | 16.2749 | 3.39E-01 | 5.5248  |
| 8.10E-01 | 100.3665 | 4.89E-01 | 14.8569 | 2.88E-01 | 4.6946  |
| 8.60E-01 | 102.0137 | 4.39E-01 | 13.4076 | 2.38E-01 | 3.8398  |
| 9.10E-01 | 103.6568 | 3.89E-01 | 12.0387 | 1.88E-01 | 2.972   |
| 9.61E-01 | 105.0544 | 3.40E-01 | 10.6877 | 1.39E-01 | 2.0684  |
| 9.99E-01 | 106.3609 | 2.89E-01 | 9.3133  | 8.84E-02 | 1.1979  |
| 9.44E-01 | 104.5897 | 2.40E-01 | 7.7759  | 9.99E-01 | 14.9616 |
| 8.89E-01 | 102.9629 | 1.89E-01 | 6.2115  | 9.38E-01 | 14.0027 |
| 8.39E-01 | 101.3208 | 1.40E-01 | 4.4969  | 8.88E-01 | 13.3764 |
| 7.90E-01 | 99.603   | 8.98E-02 | 2.7835  | 8.38E-01 | 12.7564 |

Supplementary Material (ESI) for Chemical Communications  
This journal is (c) The Royal Society of Chemistry 2011

|          |         |          |         |          |         |
|----------|---------|----------|---------|----------|---------|
| 7.39E-01 | 97.7046 | 9.09E-01 | 24.8201 | 7.88E-01 | 12.1254 |
| 6.90E-01 | 95.7031 | 8.89E-01 | 23.9729 | 7.38E-01 | 11.4423 |
| 6.40E-01 | 93.546  | 8.39E-01 | 22.9793 | 6.88E-01 | 10.7696 |
| 5.90E-01 | 91.1881 | 7.89E-01 | 22.0278 | 6.38E-01 | 10.0839 |
| 5.40E-01 | 88.6456 | 7.39E-01 | 21.0665 | 5.88E-01 | 9.389   |
| 4.90E-01 | 85.8561 | 6.89E-01 | 19.9745 | 5.39E-01 | 8.6612  |
| 4.41E-01 | 82.8282 | 6.39E-01 | 18.7376 | 4.88E-01 | 7.9082  |
| 3.91E-01 | 79.454  | 5.89E-01 | 17.555  | 4.38E-01 | 7.1446  |
| 3.41E-01 | 75.7087 | 5.40E-01 | 16.2749 | 3.88E-01 | 6.3527  |
| 2.92E-01 | 71.4011 | 4.89E-01 | 14.8569 | 3.39E-01 | 5.5248  |
| 2.43E-01 | 66.3691 | 4.39E-01 | 13.4076 | 2.88E-01 | 4.6946  |
| 1.93E-01 | 60.2247 | 3.89E-01 | 12.0387 | 2.38E-01 | 3.8398  |
| 1.45E-01 | 52.5221 | 3.40E-01 | 10.6877 | 1.88E-01 | 2.972   |
| 9.68E-02 | 42.2032 | 2.89E-01 | 9.3133  | 1.39E-01 | 2.0684  |
| 5.06E-02 | 25.0546 | 2.40E-01 | 7.7759  | 8.84E-02 | 1.1979  |
| 7.61E-03 | 4.9846  | 1.89E-01 | 6.2115  |          |         |
| 4.31E-03 | 3.4029  | 1.40E-01 | 4.4969  |          |         |
| 2.51E-03 | 2.6662  | 8.98E-02 | 2.7835  |          |         |
| 9.21E-04 | 2.2253  |          |         |          |         |

**Table S9.** The CH<sub>4</sub> Adsorption and Desorption Data of SNU-21S.

| CH <sub>4</sub> at 195 K of SNU-21S |                                              | CH <sub>4</sub> at 273 K of SNU-21S |                                              | CH <sub>4</sub> at 298 K of SNU-21S |                                              |
|-------------------------------------|----------------------------------------------|-------------------------------------|----------------------------------------------|-------------------------------------|----------------------------------------------|
| <i>P</i> / atm                      | <i>V</i> <sub>ads</sub> / cc g <sup>-1</sup> | <i>P</i> / atm                      | <i>V</i> <sub>ads</sub> / cc g <sup>-1</sup> | <i>P</i> / atm                      | <i>V</i> <sub>ads</sub> / cc g <sup>-1</sup> |
| 1.17E-04                            | 1.0472                                       | 1.00E-02                            | 0.0108                                       | 3.27E-02                            | 0.1853                                       |
| 2.25E-04                            | 1.7337                                       | 1.25E-02                            | 0.1332                                       | 4.21E-02                            | 0.4034                                       |
| 2.99E-04                            | 2.0141                                       | 2.28E-02                            | 0.5866                                       | 6.05E-02                            | 0.9489                                       |
| 4.07E-04                            | 2.2616                                       | 3.20E-02                            | 0.9798                                       | 6.20E-02                            | 0.9159                                       |
| 5.41E-04                            | 2.4222                                       | 4.23E-02                            | 1.4473                                       | 7.23E-02                            | 0.8832                                       |
| 6.20E-04                            | 2.4392                                       | 6.07E-02                            | 2.3076                                       | 8.27E-02                            | 0.8033                                       |

Supplementary Material for Chemical Communications  
This journal is (c) The Royal Society of Chemistry 2011

|          |          |          |         |          |         |
|----------|----------|----------|---------|----------|---------|
| 7.31E-04 | 2.4745   | 7.20E-02 | 2.4331  | 9.29E-02 | 0.7039  |
| 8.24E-04 | 2.4808   | 8.28E-02 | 2.5231  | 1.11E-01 | 1.1743  |
| 9.27E-04 | 2.1489   | 9.26E-02 | 2.594   | 1.61E-01 | 2.2913  |
| 1.21E-03 | 2.5595   | 1.11E-01 | 3.3526  | 2.12E-01 | 2.7942  |
| 2.22E-03 | 2.8519   | 1.60E-01 | 5.3175  | 2.62E-01 | 3.5974  |
| 3.30E-03 | 3.1153   | 2.11E-01 | 6.5283  | 3.11E-01 | 4.7603  |
| 4.34E-03 | 3.5768   | 2.61E-01 | 8.0364  | 3.61E-01 | 5.7254  |
| 5.05E-03 | 4.0038   | 3.11E-01 | 9.8878  | 4.12E-01 | 6.3211  |
| 6.48E-03 | 4.4251   | 3.61E-01 | 11.5146 | 4.62E-01 | 7.1533  |
| 7.16E-03 | 5.0358   | 4.12E-01 | 12.7853 | 5.11E-01 | 8.3088  |
| 8.13E-03 | 5.6806   | 4.61E-01 | 14.1476 | 5.61E-01 | 9.1245  |
| 9.17E-03 | 6.3167   | 5.11E-01 | 15.8388 | 6.12E-01 | 10.0245 |
| 1.02E-02 | 12.4126  | 5.61E-01 | 17.1548 | 6.61E-01 | 10.8145 |
| 1.94E-02 | 18.3608  | 6.11E-01 | 18.4653 | 7.11E-01 | 11.6038 |
| 2.94E-02 | 23.8151  | 6.61E-01 | 19.7431 | 7.62E-01 | 12.3587 |
| 3.97E-02 | 31.7193  | 7.11E-01 | 20.954  | 8.12E-01 | 13.3464 |
| 5.70E-02 | 33.6685  | 7.62E-01 | 22.0578 | 8.61E-01 | 14.169  |
| 6.18E-02 | 37.071   | 8.11E-01 | 23.3425 | 9.12E-01 | 14.6997 |
| 7.09E-02 | 40.5092  | 8.61E-01 | 24.6296 | 9.61E-01 | 15.4675 |
| 8.08E-02 | 43.7018  | 9.11E-01 | 25.387  | 9.99E-01 | 16.3381 |
| 9.09E-02 | 48.7594  | 9.61E-01 | 26.4319 | 9.39E-01 | 15.3334 |
| 1.09E-01 | 59.2465  | 9.99E-01 | 27.5239 | 8.88E-01 | 15.0173 |
| 1.55E-01 | 67.9019  | 9.39E-01 | 26.1873 | 8.38E-01 | 14.4267 |
| 2.06E-01 | 74.8972  | 8.88E-01 | 25.6048 | 7.88E-01 | 13.6303 |
| 2.57E-01 | 80.6223  | 8.39E-01 | 24.6622 | 7.39E-01 | 12.7529 |
| 3.08E-01 | 85.5639  | 7.89E-01 | 23.5472 | 6.88E-01 | 12.1946 |
| 3.59E-01 | 89.9153  | 7.39E-01 | 22.329  | 6.39E-01 | 11.4696 |
| 4.09E-01 | 93.7547  | 6.89E-01 | 21.3987 | 5.89E-01 | 10.7561 |
| 4.59E-01 | 97.1277  | 6.39E-01 | 20.2846 | 5.39E-01 | 9.956   |
| 5.10E-01 | 100.1942 | 5.89E-01 | 19.1274 | 4.88E-01 | 9.1042  |
| 5.60E-01 |          |          |         | 4.40E-01 | 7.7653  |



Elementary Materials for Chemical Applications  
This journal is (c) The Royal Society of Chemistry 2011

|          |          |          |         |          |         |
|----------|----------|----------|---------|----------|---------|
| 6.10E-01 | 103.1207 | 5.89E-01 | 17.8891 | 3.88E-01 | 7.5956  |
| 6.60E-01 | 106.1445 | 4.89E-01 | 16.5745 | 3.39E-01 | 6.7161  |
| 7.10E-01 | 109.0511 | 4.40E-01 | 14.5645 | 2.89E-01 | 5.7253  |
| 7.60E-01 | 111.5457 | 3.89E-01 | 13.8901 | 2.39E-01 | 4.5432  |
| 8.10E-01 | 114.3555 | 3.39E-01 | 12.4196 | 1.89E-01 | 3.7032  |
| 8.60E-01 | 116.8152 | 2.89E-01 | 10.8054 | 1.38E-01 | 3.2989  |
| 9.10E-01 | 119.3683 | 2.39E-01 | 8.9372  | 8.89E-02 | 1.8784  |
| 9.60E-01 | 121.7137 | 1.89E-01 | 7.3431  | 9.39E-01 | 15.3334 |
| 9.99E-01 | 123.8018 | 1.38E-01 | 6.184   | 8.88E-01 | 15.0173 |
| 9.43E-01 | 121.7708 | 8.93E-02 | 3.9054  | 8.38E-01 | 14.4267 |
| 8.89E-01 | 119.998  | 9.39E-01 | 26.1873 | 7.88E-01 | 13.6303 |
| 8.39E-01 | 118.1566 | 8.88E-01 | 25.6048 | 7.39E-01 | 12.7529 |
| 7.89E-01 | 116.078  | 8.39E-01 | 24.6622 | 6.88E-01 | 12.1946 |
| 7.39E-01 | 113.8878 | 7.89E-01 | 23.5472 | 6.39E-01 | 11.4696 |
| 6.89E-01 | 111.5007 | 7.39E-01 | 22.329  | 5.89E-01 | 10.7561 |
| 6.40E-01 | 109.0121 | 6.89E-01 | 21.3987 | 5.39E-01 | 9.956   |
| 5.90E-01 | 106.1546 | 6.39E-01 | 20.2846 | 4.88E-01 | 9.1042  |
| 5.40E-01 | 103.2211 | 5.89E-01 | 19.1274 | 4.40E-01 | 7.7653  |
| 4.90E-01 | 99.8212  | 5.39E-01 | 17.8891 | 3.88E-01 | 7.5956  |
| 4.40E-01 | 96.2265  | 4.89E-01 | 16.5745 | 3.39E-01 | 6.7161  |
| 3.91E-01 | 92.1358  | 4.40E-01 | 14.5645 | 2.89E-01 | 5.7253  |
| 3.41E-01 | 87.6445  | 3.89E-01 | 13.8901 | 2.39E-01 | 4.5432  |
| 2.92E-01 | 82.375   | 3.39E-01 | 12.4196 | 1.89E-01 | 3.7032  |
| 2.42E-01 | 76.3521  | 2.89E-01 | 10.8054 | 1.38E-01 | 3.2989  |
| 1.93E-01 | 69.0739  | 2.39E-01 | 8.9372  | 8.89E-02 | 1.8784  |
| 1.44E-01 | 59.9548  | 1.89E-01 | 7.3431  |          |         |
| 9.61E-02 | 47.8084  | 1.38E-01 | 6.184   |          |         |
| 4.78E-02 | 28.5675  | 8.93E-02 | 3.9054  |          |         |

**Table S10.** The High Pressure  $H_2$  Uptake in SNU-21H and SNU-21S at 77 K and 298 K.

| H <sub>2</sub> at 77 K of SNU-21H |            | H <sub>2</sub> at 77 K of SNU-21S |            | H <sub>2</sub> at 298 K of SNU-21H |            | H <sub>2</sub> at 298 K of SNU-21S |            |
|-----------------------------------|------------|-----------------------------------|------------|------------------------------------|------------|------------------------------------|------------|
| <i>P</i> / bar                    | Excess wt% | <i>P</i> / bar                    | Excess wt% | <i>P</i> / bar                     | Excess wt% | <i>P</i> / bar                     | Excess wt% |
| 0.0400                            | 0.0000     | 0.0400                            | 0.0000     | 0.0000                             | 0.0000     | 0.0500                             | 0.0000     |
| 1.0500                            | 1.9135     | 1.0600                            | 1.7934     | 6.2300                             | 4.1736e-4  | 1.4400                             | 0.0291     |
| 4.9600                            | 2.4626     | 4.9800                            | 2.3141     | 10.5600                            | 0.0158     | 5.0000                             | 0.0594     |
| 10.2400                           | 2.7874     | 9.9800                            | 2.5937     | 15.1600                            | 0.0387     | 10.0200                            | 0.0816     |
| 14.9200                           | 3.0140     | 15.4600                           | 2.8261     | 20.6600                            | 0.0586     | 15.4100                            | 0.1068     |
| 19.9300                           | 3.2249     | 20.0400                           | 3.0046     | 25.5800                            | 0.0780     | 20.4400                            | 0.1251     |
| 25.1700                           | 3.4201     | 24.8900                           | 3.1667     | 30.2500                            | 0.0885     | 25.2600                            | 0.1423     |
| 30.3900                           | 3.5892     | 30.4800                           | 3.3378     | 35.1800                            | 0.1025     | 30.2500                            | 0.1590     |
| 34.8900                           | 3.7298     | 35.1000                           | 3.4776     | 40.5400                            | 0.1170     | 35.0400                            | 0.1730     |
| 40.6400                           | 3.8959     | 40.2000                           | 3.6232     | 45.0400                            | 0.1349     | 40.3000                            | 0.1877     |
| 45.0700                           | 3.9992     | 44.9600                           | 3.7550     | 50.2300                            | 0.1473     | 44.9900                            | 0.2000     |
| 50.6000                           | 4.1062     | 49.9500                           | 3.8799     | 55.4300                            | 0.1620     | 50.2500                            | 0.2123     |
| 54.9700                           | 4.1964     | 55.4900                           | 4.0224     | 60.0600                            | 0.1707     | 55.1500                            | 0.2243     |
| 60.0000                           | 4.2751     | 60.4300                           | 4.1327     | 64.8300                            | 0.1763     | 60.2900                            | 0.2372     |
| 64.8800                           | 4.3387     | 65.6100                           | 4.2594     | 70.0400                            | 0.1829     | 64.9700                            | 0.2498     |
| 70.1200                           | 4.3609     | 70.7700                           | 4.3753     | 59.9400                            | 0.1675     | 70.3000                            | 0.2583     |
| 60.0100                           | 4.2858     | 60.9000                           | 4.1767     | 49.0500                            | 0.1436     | 60.0800                            | 0.2363     |
| 50.6200                           | 4.1453     | 50.6900                           | 3.9201     | 40.1500                            | 0.1260     | 49.6300                            | 0.2076     |
| 40.7200                           | 3.9149     | 41.1000                           | 3.6705     | 29.7400                            | 0.0996     | 39.6000                            | 0.1856     |
| 29.7600                           | 3.5778     | 30.4200                           | 3.3733     | 20.2400                            | 0.0655     | 30.4200                            | 0.1594     |
| 19.8100                           | 3.2207     | 20.2000                           | 3.0565     | 9.9300                             | 0.0257     | 19.8800                            | 0.1233     |
| 9.9800                            | 2.7843     | 10.0600                           | 2.6720     |                                    |            | 9.7900                             | 0.0827     |
| 4.9800                            | 2.4844     | 5.6000                            | 2.4359     |                                    |            | 4.9700                             | 0.0583     |

**Table S11.** The High Pressure CO<sub>2</sub> Uptake in SNU-21H and SNU-21S at 298 K.

| CO <sub>2</sub> at 298 K of SNU-21H |            | CO <sub>2</sub> at 298 K of SNU-21S |            |
|-------------------------------------|------------|-------------------------------------|------------|
| <i>P</i> / bar                      | Excess wt% | <i>P</i> / bar                      | Excess wt% |
| 0.0400                              | 0.5508     | 0.0500                              | 1.0992     |
| 1.0200                              | 8.1671     | 1.0600                              | 8.6546     |
| 2.1600                              | 12.6256    | 5.2300                              | 18.5612    |
| 4.9800                              | 17.3367    | 10.0800                             | 21.8947    |
| 10.2300                             | 20.7431    | 15.4400                             | 23.8123    |
| 15.1900                             | 22.2030    | 20.1400                             | 24.7310    |
| 30.0500                             | 24.0350    | 25.0600                             | 25.5450    |
| 35.8300                             | 24.5018    | 30.0700                             | 26.0328    |
| 39.7600                             | 24.9355    | 34.9500                             | 26.6320    |
| 35.4300                             | 24.5770    | 40.1100                             | 26.7851    |
| 25.2600                             | 23.7693    | 45.1400                             | 27.2020    |
| 14.8100                             | 22.2446    | 40.6000                             | 27.1005    |
| 1.0500                              | 8.4811     | 30.1800                             | 26.3854    |
|                                     |            | 20.2700                             | 25.1378    |
|                                     |            | 9.9100                              | 22.4581    |
|                                     |            | 5.1100                              | 18.9987    |

**Table S12.** The High Pressure  $\text{CH}_4$  Uptake in SNU-21H and SNU-21S at 298 K.

| CH <sub>4</sub> at 298 K of SNU-21H |            | CH <sub>4</sub> at 298 K of SNU-21S |            |
|-------------------------------------|------------|-------------------------------------|------------|
| <i>P</i> / bar                      | Excess wt% | <i>P</i> / bar                      | Excess wt% |
| 0.0400                              | 0.0190     | 0.0500                              | 0.0000     |
| 1.1200                              | 1.0200     | 1.1200                              | 1.8416     |
| 5.1100                              | 2.6986     | 5.4900                              | 3.6272     |
| 10.3700                             | 3.5681     | 10.1000                             | 4.4941     |
| 15.4300                             | 4.0653     | 15.1700                             | 5.0494     |
| 20.4700                             | 4.4410     | 20.2700                             | 5.3991     |
| 25.0600                             | 4.6716     | 24.9800                             | 5.6718     |
| 30.2700                             | 4.8425     | 30.2900                             | 5.9352     |
| 35.1300                             | 5.0046     | 35.1700                             | 6.0677     |
| 40.3700                             | 5.1303     | 39.9800                             | 6.1847     |
| 45.1800                             | 5.2048     | 46.4500                             | 6.2952     |
| 49.8800                             | 5.3231     | 50.5400                             | 6.3754     |
| 40.4300                             | 5.1428     | 40.2700                             | 6.2172     |
| 30.1700                             | 4.8675     | 30.3500                             | 5.9456     |
| 20.2400                             | 4.4212     | 20.1200                             | 5.4378     |
| 9.9800                              | 3.5676     | 9.8500                              | 4.5451     |
| 5.0500                              | 2.6748     | 4.9700                              | 3.6107     |
| 1.0400                              | 0.9436     |                                     |            |
